# Supplementary material for: Variations and determinants of carbon content in plants: a global synthesis
Source: Copernicus journal article supplement (doi:10.5194/bg-15-693-2018), 2018-02-02
Supplement: Supplementary file 1 [file bg-15-693-2018-supplement.zip]

## SUPPORTING INFORMATION

### **Variations and determinants of carbon content in plants: a global synthesis**

Suhui Ma<sup>1</sup>, Feng He<sup>2</sup>, Di Tian<sup>3</sup>, Dongting Zou<sup>1</sup>, Zhengbing Yan<sup>1</sup>, Yulong Yang<sup>4</sup>,  
Tiancheng Zhou<sup>4</sup>, Kaiyue Huang<sup>4</sup>, Haihua Shen<sup>5</sup>, Jingyun Fang<sup>1\*</sup>

<sup>1</sup> *Department of Ecology, College of Urban and Environmental Sciences, Peking University, Beijing 100871, China;*

<sup>2</sup> *College of Life Sciences, University of Chinese Academy of Sciences, Beijing 100049, China;*

<sup>3</sup> *College of Life Sciences, Capital Normal University, Beijing 100048, China;*

<sup>4</sup> *College of Earth and Environmental Sciences, Lanzhou University, Lanzhou 730000, China;*

<sup>5</sup> *State Key Laboratory of Vegetation and Environmental Change, Institute of Botany, Chinese Academy of Sciences, Beijing 100093, China*

*\*Corresponding author: Dr. Jingyun Fang*

Email: jyfang@urban.pku.edu.cn

**This file includes:**

**Figure S1**

**Table S1-S6**

**Appendix 1**

20 **Figure S1.** Changes in the species composition along the gradients of latitude, mean annual  
 21 temperature (MAT) and mean annual precipitation (MAP). The percentage of woody plants  
 22 decreased with the increasing latitude and with the decreasing MAT and MAP. Herb showed the  
 23 opposite trends with woody plants. Other life forms showed no significant change along latitudinal  
 24 and climatic gradients.

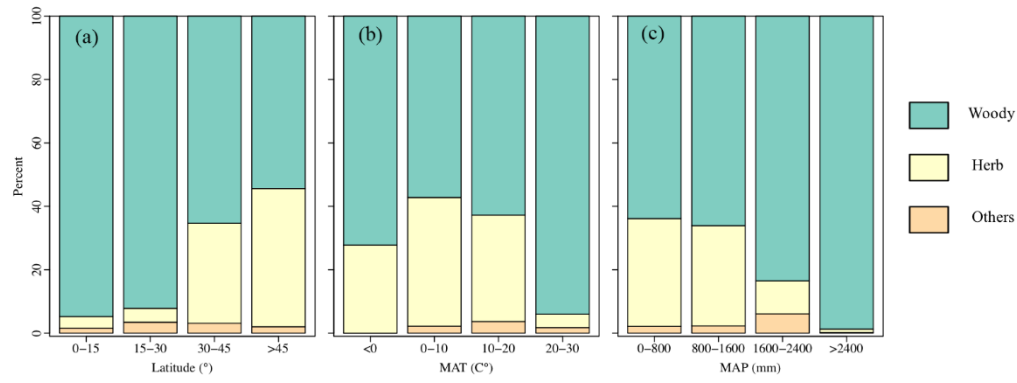

28 **Table S1.** Data sets in TRY that contributed to our global dataset of plant carbon content.  
 29 References cited in this table are attached below.

| DatasetID | Contributor            | Dataset Name                                         | Reference                             |
|-----------|------------------------|------------------------------------------------------|---------------------------------------|
| 10        | Joseph Craine          | Roots Of the World (ROW) Database                    | Craine et al.,<br>2005                |
| 34        | Jon Lloyd              | The RAINFOR Plant Trait Database                     | Fyllas et al.,<br>2009                |
| 50        | Bill Shipley           | Leaf and Whole Plant Traits Database                 | Unpublished                           |
| 52        | Hiroko Kurokawa        | Traits of Bornean Trees Database                     | Kurokawa<br>and<br>Nakashizu,<br>2008 |
| 70        | Peter Reich            | Cedar Creek Savanna SLA, C, N Database               | Willis et al.,<br>2010                |
| 77        | Enio Sosinski          | FAPESP Brazil Rainforest Database                    | Unpublished                           |
| 84        | Nadejda Soudzilovskaia | Causasus Plant Traits Database                       | Unpublished                           |
| 87        | Ülo Niinemets          | Global Leaf Robustness and Physiology<br>Database    | Niinemets,<br>2001                    |
| 101       | Dennis Baldocchi       | Photosynthesis Traits Database                       | Xu and<br>Baldocchi,<br>2003          |
| 114       | Josep Penuelas         | Hawaiian Leaf Traits Database                        | Penuelas et<br>al., 2010              |
| 125       | Benjamin Yguel         | Quercus Leaf C&N Database                            | Yguel et al.,<br>2011                 |
| 131       | Josep Penuelas         | Catalonian Mediterranean Shrubland Trait<br>Database | Unpublished                           |

---

|     |                          |                                                                           |                                  |
|-----|--------------------------|---------------------------------------------------------------------------|----------------------------------|
| 152 | Peter Adler              | Functional Traits of Graminoids in Semi-Arid Steppes Database             | Adler et al., 2004               |
| 167 | Franciska De Vries       | Leaf N-Retention Database                                                 | Unpublished                      |
| 170 | Cedric Frenette-Dussault | Plant Functional Traits of Arid Steppes in Eastern Morocco (ECWP-Morocco) | Frenette - Dussault et al., 2012 |
| 172 | Katrin Fleischer         | Leaf Characteristics of <i>Pinus Sylvestris</i> and <i>Picea Abies</i>    | Unpublished                      |
| 193 | Daniel Laughlin          | Plant Traits for <i>Pinus</i> and <i>Juniperus</i> Forests in Arizona     | Laughlin et al., 2010; 2011      |
| 223 | Gerhard Zotz             | San Lorenzo Epiphyte Leaf Traits Database                                 | Unpublished                      |
| 227 | Bruno Cerabolini         | Leaf Structure and Economic Spectrum                                      | Pierce et al., 2013              |
| 228 | Bruno Cerabolini         | Flora d'Italia Functional Traits Hoard(FIFTH)                             | Cerabolini et al., 2010          |
| 229 | Bruno Cerabolini         | Hydrophytes Traits Database                                               | Pierce et al., 2012              |
| 230 | Dylan Craven             | Panama Tree Traits                                                        | Craven et al., 2007              |
| 231 | Tomas Domingues          | TROBIT West Africa                                                        | Domingues et al., 2010           |
| 236 | Sandy Harrison           | Chinese Traits                                                            | Prentice et al., 2011            |
| 252 | Bill Shipley             | Leaf Structure and Chemistry                                              | Auger and Shipley, 2013          |
| 255 | Tomas Domingues          | LBA ECO Tapajos: Leaf Characteristics and Photosynthesis                  | Domingues et al., 2007           |

---

---

|     |                      |                                                                                          |                                   |
|-----|----------------------|------------------------------------------------------------------------------------------|-----------------------------------|
| 256 | Marko Spasojevic     | Niwot Alpine Plant Traits                                                                | Spasojevic<br>and Suding,<br>2012 |
| 262 | Mathew Williams      | LBA-ECO CD-09 Soil and Vegetation<br>Characteristics, Tapajos National Forest,<br>Brazil | Williams et<br>al., 2012          |
| 263 | Jennifer Powers      | Costa Rican Tropical Dry Forest Trees                                                    | Powers and<br>Tiffin, 2010        |
| 269 | Christopher Baraloto | The Bridge Database                                                                      | Baraloto et<br>al., 2010          |

---

30

31

**Table S2.** Model summary for the ordinary least squares (OLS) regression of plant carbon content on three factors (Latitude, MAT and MAP). Abbreviations: MAT, mean annual temperature; MAP, mean annual precipitation.

| Factor   | Organ              | <i>n</i> | <i>r</i> <sup>2</sup> | <i>p</i> |
|----------|--------------------|----------|-----------------------|----------|
| Latitude | Reproductive organ | 107      | 0.02                  | 0.147    |
| Latitude | Root               | 1800     | 0.05                  | <0.001   |
| Latitude | Leaf               | 17036    | 0.05                  | <0.001   |
| Latitude | Stem               | 3352     | 0.00                  | 0.053    |
| MAT      | Reproductive organ | 99       | 0.02                  | 0.125    |
| MAT      | Root               | 1785     | 0.04                  | <0.001   |
| MAT      | Leaf               | 17409    | 0.04                  | <0.001   |
| MAT      | Stem               | 3327     | 0.01                  | <0.001   |
| MAP      | Reproductive organ | 99       | 0.07                  | 0.009    |
| MAP      | Root               | 1785     | 0.03                  | <0.001   |
| MAP      | Leaf               | 17409    | 0.09                  | <0.001   |
| MAP      | Stem               | 3327     | 0.00                  | 0.421    |

37 **Table S3.** The summary of anova (Type III tests) for plant C content in reproductive organs.  
 38 Climatic factor includes mean annul temperature (MAT) and mean annual precipitation (MAP).

| Factor              | Sum Sq | Df | F value | P value |
|---------------------|--------|----|---------|---------|
| Intercept           | 4771   | 1  | 366.48  | < 0.001 |
| MAT                 | 6      | 1  | 0.46    | 0.50    |
| MAP                 | 8      | 1  | 0.61    | 0.44    |
| Life form           | 3      | 2  | 0.10    | 0.91    |
| MAT: MAP            | 85     | 1  | 6.66    | 0.01    |
| MAT: Life form      | 9      | 1  | 0.65    | 0.42    |
| MAP: Life form      | 29     | 1  | 2.25    | 0.14    |
| MAT: MAP: Life form | 2      | 1  | 0.14    | 0.71    |
| Residuals           | 1172   | 90 |         |         |

39  
 40

41 **Table S4.** The summary of anova (Type III tests) for plant C content in roots. Climate factor  
 42 contains mean annul temperature (MAT) and mean annual precipitation (MAP).

| Factor              | Sum Sq | Df   | F value | P value |
|---------------------|--------|------|---------|---------|
| Intercept           | 5831   | 1    | 359.17  | < 0.001 |
| MAT                 | 2      | 1    | 0.12    | 0.73    |
| MAP                 | 4      | 1    | 0.27    | 0.60    |
| Life form           | 256    | 3    | 5.25    | <0.01   |
| MAT: MAP            | 5      | 1    | 0.28    | 0.59    |
| MAT: Life form      | 328    | 3    | 6.73    | < 0.001 |
| MAP: Life form      | 73     | 3    | 1.49    | 0.21    |
| MAT: MAP: Life form | 424    | 3    | 0.87    | 0.46    |
| Residuals           | 28717  | 1769 |         |         |

43

44



45 **Table S5.** The summary of anova (Type III tests) for plant C content in leaves. Climate factor  
 46 contains mean annul temperature (MAT) and mean annual precipitation (MAP).

| Factor              | Sum Sq | Df    | F value | P value |
|---------------------|--------|-------|---------|---------|
| Intercept           | 6517   | 1     | 510.08  | < 0.001 |
| MAT                 | 22     | 1     | 1.72    | 0.19    |
| MAP                 | 39     | 1     | 3.09    | 0.08    |
| Life form           | 2829   | 3     | 73.81   | < 0.001 |
| MAT: MAP            | 13     | 1     | 1.00    | 0.32    |
| MAT: Life form      | 371    | 3     | 9.68    | < 0.001 |
| MAP: Life form      | 818    | 3     | 21.34   | < 0.001 |
| MAT: MAP: Life form | 471    | 3     | 12.29   | < 0.001 |
| Residuals           | 222234 | 17393 |         |         |

47

48

49 **Table S6.** The summary of anova (Type III tests) for plant C content in stems. Climate factor  
 50 contains mean annul temperature (MAT) and mean annual precipitation (MAP).

| Factor              | Sum Sq | Df   | F value | P value |
|---------------------|--------|------|---------|---------|
| Intercept           | 83     | 1    | 7.75    | 0.01    |
| MAT                 | 104    | 1    | 9.72    | <0.01   |
| MAP                 | 108    | 1    | 10.11   | <0.01   |
| Life form           | 286    | 3    | 8.92    | < 0.001 |
| MAT: MAP            | 107    | 1    | 10.03   | <0.01   |
| MAT: Life form      | 129    | 3    | 4.02    | 0.01    |
| MAP: Life form      | 136    | 3    | 4.25    | 0.01    |
| MAT: MAP: Life form | 108    | 3    | 3.36    | 0.02    |
| Residuals           | 35321  | 3311 |         |         |

51

52

**Appendix 1.** 24 References are form global plant carbon content dataset and the other are collected from three databases including Google Scholar (<https://scholar.google.com/>), Web of Science (<http://isiknowledge.com>) and CNKI (<http://www.cnki.net/>).

Abdul-Baki, A. A., Bryan, H. H., Zinati, G. M., Klassen, W., Codallo, M., and Heckert, N.: Biomass yield and flower production in Sunn Hemp: Effect of cutting the main stem, J. Veget. Crop Prod., 7, 83-104, 2001.

Abiven, S., Recous, S., Reyes, V., and Oliver, R.: Mineralisation of C and N from root, stem and leaf residues in soil and role of their biochemical quality, Biol. Fert. Soil., 42, 119-128, 2005.

Abiven, S., and Recous, S.: Mineralisation of crop residues on the soil surface or incorporated in the soil under controlled conditions, Biol. Fert. Soil., 43, 849-852, 2007.

Adler, P. B., Milchunas, D. G., Lauenroth, W. K., Sala, O. E., and Burke, I. C.: Functional traits of graminoids in semi - arid steppes: a test of grazing histories, J. Appl. Ecol., 41, 653-663, 2004.

Akburak, S., Oral, H. V., Ozdemir, E., and Makineci, E.: Temporal variations of biomass, carbon and nitrogen of roots under different tree species, Scand. J. Forest Res., 28, 8-16, 2013.

Al ás, J. C., Garc á, M., Sosa, T., Valares, C., and Chaves, N.: Carbon storage in the different compartments of two systems of shrubs of the southwestern Iberian Peninsula, Agroforest Syst., 89, 1-11, 2015.

Arias, D., Calvo-Alvarado, J., Richter, D. d. B., and Dohrenbusch, A.: Productivity, aboveground biomass, nutrient uptake and carbon content in fast-growing tree plantations of native and introduced species in the Southern Region of Costa Rica, Biomass Bioenerg., 35, 1779-1788, 2011.

Arunachalam, A., Pandey, H., Tripathi, R., and Maithani, K.: Fine root decomposition and nutrient mineralization patterns in a subtropical humid forest following tree cutting, Forest Ecol. Manag., 86, 141-150, 1996.

Ashkenas, L. R., Johnson, S. L., Gregory, S. V., Tank, J. L., and Wollheim, W. M.: A Stable Isotope Tracer Study of Nitrogen Uptake and Transformation in an Old-Growth Forest Stream, Ecology, 85, 1725-1739, 2004.

83 Asner, G. P., and Beatty, S. W.: Effects of an African grass invasion on Hawaiian shrubland  
84 nitrogen biogeochemistry, *Plant Soil*, 186, 205-211, 1996.

85 Auger, S., and Shipley, B.: Inter - specific and intra - specific trait variation along short  
86 environmental gradients in an old - growth temperate forest, *J. Veg. Sci.*, 24, 419-428,  
87 2013.

88 Austin, A. T., and Sala, O. E.: Carbon and nitrogen dynamics across a natural precipitation  
89 gradient in Patagonia, Argentina, *J. Veg. Sci.*, 13, 351-360, 2002.

90 Balboa-Murias, M. A., Rojo, A., Álvarez, J. G., and Merino, A.: Carbon and nutrient stocks in  
91 mature *Quercus robur* L. stands in NW Spain, *Ann. Forest Sci.*, 63, 557-565, 2006.

92 Baraloto, C., Timothy Paine, C., Poorter, L., Beauchene, J., Bonal, D., Domenach, A. M.,  
93 H é rault, B., Pati ñ o, S., Roggy, J. C., and Chave, J.: Decoupled leaf and stem economics  
94 in rain forest trees, *Ecol. Lett.*, 13, 1338-1347, 2010.

95 Barbaroux, C., Br é la, N., and Dufr â ne, E.: Distribution of above - ground and below - ground  
96 carbohydrate reserves in adult trees of two contrasting broad - leaved species (*Quercus*  
97 *petraea* and *Fagus sylvatica*), *New Phytol.*, 157, 605-615, 2003.

98 Barradas, M. C. D., Zunzunegui, M., and Novo, F. G.: Autecological traits of *Halimium*  
99 *halimifolium* in contrasting habitats under a Mediterranean type climate—A review, *Folia*  
100 *Geobot.*, 34, 189-208, 1999.

101 Bass, R., Garcia-Perez, M., Horneck, D., Lewis, M., Pan, B., Peters, T., Stevens, B., and  
102 Wysocki, D.: Carbon Implications of Converting a Coal-Fired Power Plant to Combustion  
103 of Torrefied *Arundo Donax*, *Applied Bioenerg.*, 1, 2014.

104 Becker, G. S., Braun, D., Gliniars, R., and Dalitz, H.: Relations between wood variables and  
105 how they relate to tree size variables of tropical African tree species, *Trees*, 26, 1101-1112,  
106 2012.

107 Bell, C., Carrillo, Y., Boot, C. M., Rocca, J. D., Pendall, E., and Wallenstein, M. D.:  
108 Rhizosphere stoichiometry: are C: N: P ratios of plants, soils, and enzymes conserved at  
109 the plant species - level?, *New Phytol.*, 201, 505-517, 2014.

110 Berg, B.: Decomposition of root litter and some factors regulating the process: long-term root  
111 litter decomposition in a Scots pine forest, *Soil Biol. Biochem.*, 16, 609-617, 1984.

- 112 Bert, D., and Danjon, F.: Carbon concentration variations in the roots, stem and crown of mature  
113 *Pinus pinaster* (Ait.), Forest Ecol. Manag., 222, 279-295, 2006.
- 114 Bertiller, M. B., Mazzarino, M. J., Carrera, A. L., Diehl, P., Satti, P., Gobbi, M., and Sain, C.  
115 L.: Leaf strategies and soil N across a regional humidity gradient in Patagonia, Oecologia,  
116 148, 612-624, 2006.
- 117 Bloomfield, J., Vogt, K. A., and Vogt, D. J.: Decay rate and substrate quality of fine roots and  
118 foliage of two tropical tree species in the Luquillo Experimental Forest, Puerto Rico, Plant  
119 Soil, 150, 233-245, 1993.
- 120 Borden, K. A., Isaac, M. E., Thevathasan, N. V., Gordon, A. M., and Thomas, S. C.: Estimating  
121 coarse root biomass with ground penetrating radar in a tree-based intercropping system,  
122 Agroforest Syst., 88, 657-669, 2014.
- 123 Brantley, E.: Influence of Chinese Privet (*Ligustrum sinense* Lour.) on Riparian Forests of the  
124 Southern Piedmont: Net Primary, Dissertations & Theses - Gradworks, 2008.
- 125 Bret-Harte, M. S., Mack, M., and Shaver, G.: Above ground plant and below ground stem  
126 biomass of samples from the severely burned site of the Anutuvuk River fire, Alaska. Long  
127 Term Ecological Research Network, 2015.
- 128 Campioli, M., Michelsen, A., Demey, A., Vermeulen, A., Samson, R., and Lemeur, R.: Net  
129 Primary Production and Carbon Stocks for Subarctic Mesic-Dry Tundras with Contrasting  
130 Microtopography, Altitude, and Dominant Species, Ecosystems, 12, 760-776, 2009a.
- 131 Campioli, M., Samson, R., Michelsen, A., Jonasson, S., Baxter, R., and Lemeur, R.:  
132 Nonvascular contribution to ecosystem NPP in a subarctic heath during early and late  
133 growing season, Plant Ecol., 202, 41-53, 2009b.
- 134 Campoe, O. C., Stape, J. L., Laclau, J.-P., Marsden, C., and Nouvellon, Y.: Stand-level patterns  
135 of carbon fluxes and partitioning in a *Eucalyptus grandis* plantation across a gradient of  
136 productivity, in São Paulo State, Brazil, Tree Physiol., 32, 696-706, 2012.
- 137 Cao, S., Feng, Q., Si, J., Zhang, X., Liu, W., and CHang, Z.: Status of Foliar Nutrients in  
138 *Populus euphratica* Desert Riparian Forest in Northwestern China, J. Desert Res., 31,  
139 1131-1140, 2011. (in Chinese).

140 Cao, Y., and Chen, Y.: Biomass, carbon and nutrient storage in a 30-year-old Chinese cork oak  
 141 (*Quercus variabilis*) forest on the south slope of the Qinling Mountains, China, *Forests*, 6,  
 142 1239-1255, 2015.

143 Cartaxana, P., and Catarino, F.: Allocation of nitrogen and carbon in an estuarine salt marsh in  
 144 Portugal, *J. Coast Conserv.*, 3, 27-34, 1997.

145 Castaño-Santamaría, J., and Bravo, F.: Variation in carbon concentration and basic density  
 146 along stems of sessile oak (*Quercus petraea* (Matt.) Liebl.) and Pyrenean oak (*Quercus*  
 147 *pyrenaica* Willd.) in the Cantabrian Range (NW Spain), *Ann. Forest Sci.*, 69, 663-672,  
 148 2012.

149 Cerabolini, B. E., Brusa, G., Ceriani, R. M., De Andreis, R., Luzzaro, A., and Pierce, S.: Can  
 150 CSR classification be generally applied outside Britain?, *Plant Ecol.*, 210, 253-261, 2010.

151 Cernusak, L. A., and Hutley, L. B.: Stable isotopes reveal the contribution of cortical  
 152 photosynthesis to growth in branches of *Eucalyptus miniata*, *Plant Physiol.*, 155, 515-523,  
 153 2011.

154 Chai, Y., Zhang, X., Yue, M., Liu, X., Li, Q., Shang, H., Meng, Q., and Zhang, R.: Leaf traits  
 155 suggest different ecological strategies for two *Quercus* species along an altitudinal  
 156 gradient in the Qinling Mountains, *J. Forest Res.*, 20, 501-513, 2015.

157 Chaturvedi, R. K., and Raghubanshi, A. S.: Phenotypic plasticity in functional traits of woody  
 158 species in tropical dry forest, 35-66 pp., 2013.

159 Chaves, B., De Neve, S., Hofman, G., Boeckx, P., and Van Cleemput, O.: Nitrogen  
 160 mineralization of vegetable root residues and green manures as related to their (bio)  
 161 chemical composition, *Europ. J. Agron.*, 21, 161-170, 2004.

162 Chen, D., Li, Y., Liu, H., Xu, H., Xiao, W., Luo, T., Zhou, Z., and Lin, M.: Biomass and carbon  
 163 dynamics of a tropical mountain rain forest in China, *Sci. China Life Sci.*, 53, 798-810,  
 164 2010.

165 Chen, G. S., Yang, Y. S., Xie, J. S., Guo, J. F., Gao, R., and Qian, W.: Conversion of a natural  
 166 broad-leaved evergreen forest into pure plantation forests in a subtropical area: effects on  
 167 carbon storage, *Ann. Forest Sci.*, 62, 659-668, 2005.

168 Chen, Q.: Study on Carbon Storage of Different Masson Pine Mixed Forests, Anhui  
 169 Agricultural University, 2012. (in Chinese).

170 Chen, Z., Liu, X., and Xiong, Z.: Analysis on Carbon Content and Caloric Values of Masson  
 171 Pine in Southern China, *Central South Forest Inventory and Planning*, 30, 54-58, 2011. (in  
 172 Chinese).

173 Cheng, G., and Luo, j.: The Carbon Accumulation and Dissipation Features of Sub-alpine  
 174 Woodland in Mt. Gongga, *Acta Geographica Sinica*, 58, 179-185, 2003. (in Chinese).

175 Cheng, T.: Forest Biomass and Carbon Storage in Xiaolong Mountain, Gansu Province, Beijing  
 176 Forestry University, 2007. (in Chinese).

177 Cheng, T., Feng, J., Ma, Q., Feng, Z., Kang, F., and zhang, Y.: Forest biomass and carbon  
 178 storage of *Quercus aliena* var. *acuteserrata* stand-types in Xiaolong Mountains, Gansu  
 179 Province, J. Beijing Forestry Univ., 209-215, 2007. (in Chinese).

180 Clarke, P.: Nitrogen pools and soil characteristics of a temperate estuarine wetland in eastern  
 181 Australia, *Aquat Bot.*, 23, 275-290, 1985.

182 Cochran, V.: Decomposition of barley straw in a subarctic soil in the field, *Biol. Fert. Soil.*, 10,  
 183 227-232, 1991.

184 Collins, C. G., Wright, S. J., and Wurzburger, N.: Root and leaf traits reflect distinct resource  
 185 acquisition strategies in tropical lianas and trees, *Oecologia*, 180, 1037, 2016.

186 Confalonieri, R., Perego, A., Chiodini, M. E., Scaglia, B., Rosenmund, A. S., and Acutis, M.:  
 187 Analysis of sample size for variables related to plant, soil, and soil microbial respiration  
 188 in a paddy rice field, *Field Crops Res.*, 113, 125-130, 2009.

189 Couteaux, M. M., Herve, D., and Mita, V.: Carbon and Nitrogen Dynamics of Potato Residues  
 190 and Sheep Dung in a Two-Year Rotation Cultivation in the Bolivian Altiplano, *Commun.*  
 191 *Soil Sci. Plant Analys.*, 39, 475-498, 2008.

192 Craine, J. M., Lee, W. G., Bond, W. J., Williams, R. J., and Johnson, L. C.: Environmental  
 193 constraints on a global relationship among leaf and root traits of grasses, *Ecology*, 86, 12-  
 194 19, 2005.

195 Craven, D., Braden, D., Ashton, M., Berlyn, G., Wishnie, M., and Dent, D.: Between and  
 196 within-site comparisons of structural and physiological characteristics and foliar nutrient  
 197 content of 14 tree species at a wet, fertile site and a dry, infertile site in Panama, *Forest*  
 198 *Ecol. Manag.*, 238, 335-346, 2007.

199 Creamer, C. A., Filley, T. R., Olk, D. C., Stott, D. E., Dooling, V., and Boutton, T. W.: Changes  
200 to soil organic N dynamics with leguminous woody plant encroachment into grasslands,  
201 Biogeochemistry, 113, 307-321, 2013.

202 Daudu, C., Muchaonyerwa, P., and Mnkeni, P.: Litterbag decomposition of genetically  
203 modified maize residues and their constituent *Bacillus thuringiensis* protein (Cry1Ab)  
204 under field conditions in the central region of the Eastern Cape, South Africa, Agric.  
205 Ecosyst. Environ., 134, 153-158, 2009.

206 Dehkordi, M., and Mahdi, M.: On the design and analysis of forest biomass to biofuel and  
207 bioenergy supply chains, University of British Columbia, 2015.

208 Dejong, T. M., and Walton, E. F.: Carbohydrate requirements of peach fruit growth and  
209 respiration, Tree Physiol., 5, 329, 1989.

210 Deng, H., Geng, G., and Wang, Z.: Carbon storage and allocation of 35-year-old *Pinus*  
211 *massoniana* forest ecosystem in southern of Henan province, J. Central South Univ. Forest.  
212 Tech., 30, 5-9, 2010a. (in Chinese).

213 Deng, H., Zhu, X., Ru, G., Geng, G., Wang, Z., and Zhang, L.: Carbon storage and distribution  
214 in a 18-year-old *cunninghamia lanceolata* forest ecosystem in South of Henan, J. Henan  
215 Agric. Univ., 44, 513-517, 2010b. (in Chinese).

216 Domingues, T. F., Martinelli, L. A., and Ehleringer, J. R.: Ecophysiological traits of plant  
217 functional groups in forest and pasture ecosystems from eastern Amazonia, Brazil, Plant  
218 Ecol., 193, 101-112, 2007.

219 Domingues, T. F., Meir, P., Feldpausch, T. R., Saiz, G., Veenendaal, E. M., Schrod, F., Bird,  
220 M., Djagbletey, G., Hien, F., and Compaore, H.: Co - limitation of photosynthetic  
221 capacity by nitrogen and phosphorus in West Africa woodlands, Plant Cell Environ., 33,  
222 959-980, 2010.

223 Dong, Z., Bai, X., Hou, Y., and Bu, Q.: Leaf Calorific Value of 8 Tree Species in the Coastal  
224 Areas of Jiaodong and Cost of Construction of Leaf Biomass and Its Adaptability, Scientia  
225 Silvae Sinicae, 51, 8-15, 2015. (in Chinese).

226 Downton, W., and Grant, W.: Photosynthetic physiology of spur pruned and minimal pruned  
227 grapevines, Func. Plant Biol., 19, 309-316, 1992.



228 Duke, N. C., Mackenzie, J., and Wood, A.: Preliminary assessment of biomass and carbon  
 229 content of mangroves in Solomon Islands, Vanuatu, Fiji, Tonga and Samoa, Townsville,  
 230 James Cook University, TropWATER centre: Report to IUCN MESCAL project, 2013.

231 Elias, M., and Potvin, C.: Assessing inter-and intra-specific variation in trunk carbon  
 232 concentration for 32 neotropical tree species, *Can. J. Forest Res.*, 33, 1039-1045, 2003.

233 Ewel, J., Berish, C., Brown, B., Price, N., and Raich, J.: Slash and burn impacts on a Costa  
 234 Rican wet forest site, *Ecology*, 62, 816-829, 1981.

235 Fang, S., Xue, J., and Tang, L.: Biomass production and carbon sequestration potential in poplar  
 236 plantations with different management patterns, *J. Environ. Manage.*, 85, 672-679, 2007.

237 Fang, S., Li, H., Sun, Q., and Chen, L.: Biomass production and carbon stocks in poplar-crop  
 238 intercropping systems: a case study in northwestern Jiangsu, China, *Agroforest Syst.*, 79,  
 239 213-222, 2010.

240 Fang, X., Tian, D., Xiang, W., and Cai, B.: On carbon accumulation, distribution of different  
 241 densities in slash pine plantation, *J. Zhejiang Forestry College*, 20, 374-379, 2003. (in  
 242 Chinese).

243 Farnsworth, E. J., and Meyerson, L. A.: Comparative ecophysiology of four wetland plant  
 244 species along a continuum of invasiveness, *Wetlands*, 23, 750-762, 2003.

245 Fatunbi, A. O., Dube, S., Yakubu, M. T., and Tshabalala, T.: Allelopathic potential of *Acacia*  
 246 *mearnsii* De Wild, *World Appl. Sci. J.*, 8, 572-577, 2013.

247 Fay, P. A., Hartnett, D. C., and Knapp, A. K.: Plant tolerance of gall - insect attack and gall -  
 248 insect performance, *Ecology*, 77, 521-534, 1996.

249 February, E., Cook, G., and Richards, A.: Root dynamics influence tree–grass coexistence in  
 250 an Australian savanna, *Austral Ecol.*, 38, 66-75, 2013.

251 Feng, L., Tong, C., Shi, H., Wu, J., Li, Y., Huang, T., and Xia, H.: Effect of Fertilization on the  
 252 Absorption, Partition and Accumulation of Carbon and Nitrogen of Rice Under the Equal  
 253 N Conditions, *Environ. Sci.*, 32, 574-580, 2011. (in Chinese).

254 Fernández, M., García-Albalá J., Andivia, E., Alaejos, J., Tapias, R., and Menéndez, J.: Sickie  
 255 bush (*Dichrostachys cinerea* L.) field performance and physical–chemical property  
 256 assessment for energy purposes, *Biomass Bioenerg.*, 81, 483-489, 2015.

- 257 Fioretto, A., Papa, S., and Fuggi, A.: Litter-fall and litter decomposition in a low Mediterranean  
258 shrubland, *Biol. Fertil. Soil*, 39, 37-44, 2003.
- 259 Firdaus, M. S., and Husni, M. H.: Planting *Jatropha curcas* on constrained land: emission and  
260 effects from land use change, *Sci. World J.*, 2012, 405084, 2012.
- 261 Fonseca, W., Benayas, J. M. R., and Alice, F. E.: Carbon accumulation in the biomass and soil  
262 of different aged secondary forests in the humid tropics of Costa Rica, *Forest Ecol. Manag.*,  
263 262, 1400-1408, 2011.
- 264 Fonseca, W., Alice, F. E., and Rey-Benayas, J. M.: Carbon accumulation in aboveground and  
265 belowground biomass and soil of different age native forest plantations in the humid  
266 tropical lowlands of Costa Rica, *New Forest*, 43, 197-211, 2012.
- 267 Fonte, S. J., and Schowalter, T. D.: Decomposition of greenfall vs. senescent foliage in a  
268 tropical forest ecosystem in Puerto Rico, *Biotropica*, 36, 474-482, 2004.
- 269 Fortier, J., Truax, B., Gagnon, D., and Lambert, F.: Biomass carbon, nitrogen and phosphorus  
270 stocks in hybrid poplar buffers, herbaceous buffers and natural woodlots in the riparian  
271 zone on agricultural land, *J. Environ. Manage.*, 154, 333-345, 2015.
- 272 Fortunel, C., Garnier, E., Joffre, R., Kazakou, E., Queded, H. M., Grigulis, K., Lavorel, S.,  
273 Ansquer, P., Castro, H., and Cruz, P.: Leaf traits capture the effects of land use changes  
274 and climate on litter decomposability of grasslands across Europe, *Ecology*, 90, 598-611,  
275 2009.
- 276 Francis, J. K.: Estimating biomass and carbon content of saplings in Puerto Rican secondary  
277 forests, *Caribb. J. Sci.*, 36, 346-350, 2000.
- 278 Franco, A., Duarte, H., Geßler, A., de Mattos, E., Nahm, M., Rennenberg, H., Ribeiro, K.,  
279 Scarano, F., and Lüttge, U.: In situ measurements of carbon and nitrogen distribution and  
280 composition, photochemical efficiency and stable isotope ratios in *Araucaria angustifolia*,  
281 *Trees.*, 19, 422-430, 2005.
- 282 Frank, A., Berdahl, J., Hanson, J., Liebig, M., and Johnson, H.: Biomass and carbon partitioning  
283 in switchgrass, *Crop Sci.*, 44, 1391-1396, 2004.
- 284 Frenette - Dussault, C., Shipley, B., Léger, J. F., Meziane, D., and Hingrat, Y.: Functional  
285 structure of an arid steppe plant community reveals similarities with Grime's C - S - R  
286 theory, *J. Veg. Sci.*, 23, 208-222, 2012.

287 Fu, Y., Wang, X., and Sun, Y.: Carbon concentration variability of *Larix olgensis* in North-  
 288 Eastern China, *Adv. J. Food Sci. Techn.*, 5, 627-632, 2013.

289 Fukushima, K., Usui, N., Ogawa, R., and Tokuchi, N.: Impacts of moso bamboo (*Phyllostachys*  
 290 *pubescens*) invasion on dry matter and carbon and nitrogen stocks in a broad - leaved  
 291 secondary forest located in Kyoto, western Japan, *Plant Species Biol.*, 30, 81-95, 2015.

292 Fyllas, N. M., Patino, S., Baker, T., Bielefeld Nardoto, G., Martinelli, L., Quesada, C., Paiva,  
 293 R., Schwarz, M., Horna, V., and Mercado, L.: Basin-wide variations in foliar properties of  
 294 Amazonian forest: phylogeny, soils and climate, *Biogeosciences*, 6, 2677-2708, 2009.

295 Gao, H.: Study on the compatible models of tree carbon content for main conifer species in  
 296 Northeast part of China, Northeast Forestry University, Haerbin, 2014. (in Chinese).

297 Gary, C., Bot, J. L., Frossard, J. S., and Andriolo, J. L.: Ontogenic changes in the construction  
 298 cost of leaves, stems, fruits, and roots of tomato plants, *J. Exp. Bot.*, 49, 59-68, 1998.

299 Geng, X.: Carbon concentration storage and Partition of Poplar in shelterbelts in Plain areas,  
 300 Beijing Forestry University, 2010. (in Chinese).

301 Geßler, A., Duarte, H., Franco, A., Lüttge, U., De Mattos, E., Nahm, M., Rodrigues, P., Scarano,  
 302 F., and Rennenberg, H.: Ecophysiology of selected tree species in different plant  
 303 communities at the periphery of the Atlantic Forest of SE—Brazil III. Three legume trees  
 304 in a semi-deciduous dry forest, *Trees*, 19, 523-530, 2005.

305 Geßler, A., Duarte, H., Franco, A., Lüttge, U., De Mattos, E., Nahm, M., Scarano, F., Zaluar,  
 306 H., and Rennenberg, H.: Ecophysiology of selected tree species in different plant  
 307 communities at the periphery of the Atlantic Forest of SE-Brazil II. Spatial and ontogenetic  
 308 dynamics in *Andira legalis*, a deciduous legume tree, *Trees*, 19, 510-522, 2005.

309 Giese, L. A., Aust, W., Kolka, R. K., and Trettin, C. C.: Biomass and carbon pools of disturbed  
 310 riparian forests, *Forest Ecol. Manag.*, 180, 493-508, 2003.

311 Goldfarb, D., Hendrick, R., and Pregitzer, K.: Seasonal nitrogen and carbon concentrations in  
 312 white, brown and woody fine roots of sugar maple (*Acer saccharum* Marsh), *Plant Soil*,  
 313 126, 144-148, 1990.

314 González-García, M., Hevia, A., Majada, J., Rubiera, F., and Barrio-Anta, M.: Nutritional,  
 315 carbon and energy evaluation of *Eucalyptus nitens* short rotation bioenergy plantations in  
 316 northwestern Spain, *Iforest*, 9, 303, 2015.

- 317 González, J., Bruno, M., Valoy, M., and Prado, F.: Genotypic variation of gas exchange  
318 parameters and leaf stable carbon and nitrogen isotopes in ten quinoa cultivars grown  
319 under drought, *J. Agron. Crop Sci.*, 197, 81-93, 2011.
- 320 Grossman, Y. L., and DeJong, T. M.: PEACH: a simulation model of reproductive and  
321 vegetative growth in peach trees, *Tree Physiol.*, 14, 329-345, 1994.
- 322 Grunzweig, J. M., Gelfand, I., Fried, Y., and Yakir, D.: Biogeochemical factors contributing to  
323 enhanced carbon storage following afforestation of a semi-arid shrubland, *Biogeosciences*,  
324 4, 891-904, 2007.
- 325 Gu, L., Guo, Y., Lang, N., Yang, X., Ze, S., Li, J., Ruan, H., and Gu, X.: Carbon density and  
326 allocation in young *Jatropha Curcas* stands of the Honghe Region, Yunnan Province, *J.*  
327 *Zhejiang Forestry College*, 27, 671-676, 2010. (in Chinese).
- 328 Guendehou, G., Lehtonen, A., Moudachirou, M., Mäkipää R., and Sinsin, B.: Stem biomass  
329 and volume models of selected tropical tree species in West Africa, *Southern Forests: J.*  
330 *Forest Sci.*, 74, 77-88, 2012.
- 331 Hancock, J. E., Loya, W. M., Giardina, C. P., Li, L., Chiang, V. L., and Pregitzer, K. S.: Plant  
332 growth, biomass partitioning and soil carbon formation in response to altered lignin  
333 biosynthesis in *Populus tremuloides*, *New Phytol.*, 173, 732-742, 2007.
- 334 He, B., Yu, C., Wang, A., Li, J., Chen, Y., and Rong, y.: Carbon storage and distribution in  
335 *Acacia crassicaarpa* plantation ecosystem, *J. Nanjing Forest. Univ. (Natural Science*  
336 *Edition)*, 33, 46-50, 2009. (in Chinese).
- 337 He, H., He, R., Duan, X., and Chen, X.: Study on Carbon Storage in Main Afforestation Tree  
338 Species of the Second Forest Zone around Guiyang City, *J. Anhui Agric. Sci.*, 35, 10270-  
339 10271, 2007. (in Chinese).
- 340 He, M., Zhang, K., Tan, H., Hu, R., Su, J., Wang, J., Huang, L., Zhang, Y., and Li, X.: Nutrient  
341 levels within leaves, stems, and roots of the xeric species *Reaumuria soongorica* in  
342 relation to geographical, climatic, and soil conditions, *Ecol. Evol.*, 5, 1494-1503, 2015.
- 343 He, Y., Qin, L., Li, Z., Liang, X., Shao, M., and Tan, L.: Carbon storage capacity of  
344 monoculture and mixed-species plantations in subtropical China, *Forest Ecol. Manag.*, 295,  
345 193-198, 2013.

346 Heard, J., Cavers, C., and Adrian, G.: The Nutrient Loss with Straw Removal or Burning in  
347 Manitoba, 2001.

348 Heard, J.: The High N soil test is right C or your money back!, Standing Stubble Mb Zero-Till  
349 Research Assoc Newsletter, 12, 2005.

350 Heard, J., B. Brolley, and Park, R.: Nutrient Uptake and Removal Values for Dry Beans,  
351 Soybeans and Sunflowers in Manitoba, Manitoba Soil Fertility Advisory Committee, 45,  
352 9-14, 2006.

353 Herman, W. A., McGill, W. B., and Dormaar, J. F.: Effects of initial chemical composition on  
354 decomposition of roots of three grass species, Can. J. Soil Sci., 57, 205-215, 2011.

355 Herrero de Aza, C., Turrión, M. B., Pando, V., and Bravo, F.: Carbon in heartwood, sapwood  
356 and bark along the stem profile in three Mediterranean *Pinus* species, Ann. Forest Sci., 68,  
357 1067-1076, 2011.

358 Hodson, M. J., Parker, A. G., Leng, M. J., and Sloane, H. J.: Silicon, oxygen and carbon isotope  
359 composition of wheat (*Triticum aestivum* L.) phytoliths: implications for palaeoecology  
360 and archaeology, J. Quat. Sci., 23, 331-339, 2008.

361 Hossain, M.: Carbon pools and fluxes in *Bruguiera parviflora* dominated naturally growing  
362 mangrove forest of *Peninsular Malaysia*, Wetl. Ecol. Manage., 22, 15-23, 2014.

363 Hossain, M., Saha, C., Abdullah, S. M. R., Saha, S., and Siddique, M. R. H.: Allometric biomass,  
364 nutrient and carbon stock models for *Kandelia candel* of the Sundarbans, Bangladesh,  
365 Trees, 30, 709-717, 2016.

366 Hou, L., Lei, R., Wang, D., Shang, L., and Zhao, H.: Carbon Density of Herbage in Natural  
367 Secondary *Pinus tabulaeformis* Forest in Huoditang Zone , Qinling Moutains, Acta  
368 Agrestia Sinica, 16, 262-266, 2008. (in Chinese).

369 Hou, L., Lei, R., Wang, D., Shang, L., and Zhao, H.: Carbon Density of Arbor Layer in *Pinus*  
370 *tabulaeformis* Community in Huoditang Forest Region of Qilliliig Mountains, J. Northeast  
371 Forest. Univ., 37, 23-24, 2009. (in Chinese).

372 Hoyt, G. D.: The effects of tillage systems on burley tobacco yield and nitrogen uptake patterns,  
373 Tobacco Science, 1-6, 2000.

374 Hu, H., Sun, L., Guo, Q., and Lü x.: Carbon Emissions from Forest Fires on Main Arbor  
 375 Species in Daxing'an Mountains in Heilongjiang Province, *Scientia Silvae Sinicae*, 43,  
 376 82-88, 2007. (in Chinese).

377 Huang, X., LIU, W., Su, J., LI, S., and Lang, X.: Stoichiometry of leaf C, N and P across 152  
 378 woody species of a monsoon broad-leaved evergreen forest in Pu'er, Yunnan Province,  
 379 *Chinese J. Ecol.*, 35, 567-575, 2016. (in Chinese).

380 Huang, y., Lin, s., Jiang, G., Han, R., and Gao, L.: Characteristics of Nitrogen and Carbon  
 381 contents in Plants and Soil in the Haihe River Basin, *Acta Ecologica Sinica*, 14, 225-234,  
 382 1994. (in Chinese).

383 Hughes, R. F., Kauffman, J. B., and Jaramillo, V. J.: Biomass, carbon, and nutrient dynamics  
 384 of secondary forests in a humid tropical region of Mexico, *Ecology*, 80, 1892-1907, 1999.

385 Hughes, R. F., Archer, S. R., Asner, G. P., Wessman, C. A., McMurtry, C., Nelson, J., and  
 386 Ansley, R. J.: Changes in aboveground primary production and carbon and nitrogen pools  
 387 accompanying woody plant encroachment in a temperate savanna, *Global Change Biol.*,  
 388 12, 1733-1747, 2006.

389 Hurd, T., Raynal, D., and Schwintzer, C.: Symbiotic N<sub>2</sub> fixation of *Alnus incana* ssp. *rugosa*  
 390 in shrub wetlands of the Adirondack Mountains, New York, USA, *Oecologia*, 126, 94-  
 391 103, 2001.

392 Iivonen, S., Kaakinen, S., Jolkkonen, A., Vapaavuori, E., and Linder, S.: Influence of long-term  
 393 nutrient optimization on biomass, carbon, and nitrogen acquisition and allocation in  
 394 Norway spruce, *Can. J. Forest Res.*, 36, 1563-1571, 2006.

395 Isagi, Y.: Carbon stock and cycling in a bamboo *Phyllostachys bambusoides* stand, *Ecol. Res.*,  
 396 9, 47-55, 1994.

397 Ishida, A., Yazaki, K., and Hoe, A. L.: Ontogenetic transition of leaf physiology and anatomy  
 398 from seedlings to mature trees of a rain forest pioneer tree, *Macaranga gigantea*, *Tree*  
 399 *Physiol.*, 25, 513, 2005.

400 Jana, B. K., Biswas, S., Majumder, M., Roy, P. K., and Mazumdar, A.: Comparative  
 401 Assessment Of Carbon Sequestration Rate And Biomass Carbon Potential of Young  
 402 *Shorea robusta* and *Albizia lebbek*, 01, 2009.

403 Jana, B. K., Biswas, S., Majumder, M., Roy, P. K., and Mazumdar, A.: Carbon sequestration  
 404 rate and aboveground biomass carbon potential of three young species in lower Gangetic  
 405 plain, J. Environ. Sci. Engin., 53, 299, 2011.

406 Janssens, I. A., Sampson, D. A., Cermak, J., Meiresonne, L., Riguzzi, F., Overloop, S., and  
 407 Ceulemans, R.: Above-and belowground phytomass and carbon storage in a Belgian Scots  
 408 pine stand, Ann. Forest Sci., 56, 81-90, 1999.

409 Jaramillo, V. J., Ahedo-Hernández, R., and Kauffman, J. B.: Root biomass and carbon in a  
 410 tropical evergreen forest of Mexico: changes with secondary succession and forest  
 411 conversion to pasture, J. Trop. Ecol., 19, 457-464, 2003.

412 Jiang, L., Peng, Z., He, B., Hou, Z., and Du, Y.: Caloric Value and Carbon Content of *Quercus*  
 413 *variabilis* of Six Ages, Heilongjiang Agric. Sci., 2010, 85-89, 2010. (in Chinese).

414 Jiang, P., Cao, Y., and Chen, Y.: C, N, P stoichiometric characteristics of tree, shrub, herb  
 415 leaves and litter in forest community of Shaanxi Province, China, Chinese J. Appl. Ecol.,  
 416 27, 365-372, 2016. (in Chinese).

417 Johnson, J. M. F., Barbour, N. W., and Weyers, S. L.: Chemical composition of crop biomass  
 418 impacts its decomposition, Soil Sci. Soc. Am. J., 71, 155-162, 2007.

419 Jones, D. A., and O'hara, K. L.: Carbon density in managed coast redwood stands: implications  
 420 for forest carbon estimation, Forestry, 85, 99-110, 2011.

421 Kahle, P., Beuch, S., Boelcke, B., Leinweber, P., and Schulten, H. R.: Cropping of *Miscanthus*  
 422 in Central Europe: biomass production and influence on nutrients and soil organic matter,  
 423 Europ. Jo. Agron., 15, 171-184, 2001.

424 Kai, Z., Xu, X. N., Qin, W., and Bo, L.: Biomass, and carbon and nitrogen pools in a subtropical  
 425 evergreen broad-leaved forest in eastern China, J. Forest Res., 15, 274-282, 2010.

426 Kambatuku, J. R., Cramer, M. D., and Ward, D.: Intraspecific competition between shrubs in a  
 427 semi-arid savanna, Plant Ecol., 212, 701-713, 2011.

428 Kang, B., Liu, S., Zhang, G., Chang, J., Wen, Y., MA, J., and Hao, W.: Carbon accumulation  
 429 and distribution in *Pinus massoniana* and *Cunninghamia lanceolata* mixed forest  
 430 ecosystem in Daqingshan, Guangxi of China, Acta Ecologica Sinica, 26, 1320-1329, 2006.  
 431 (in Chinese).

- 432 Kang, B., Liu, S., Cai, D., and Lu, L.: Characteristics of Biomass, Carbon Accumulation and  
433 Its Spatial Distribution in *Cunninghamia lanceolata* Forest Ecosystem in Low Subtropical  
434 Area, *Scientia Silvae Sinicae*, 45, 147-153, 2009. (in Chinese).
- 435 Kazakou, E., Vile, D., Shipley, B., Gallet, C., and Garnier, E.: Co - variations in litter  
436 decomposition, leaf traits and plant growth in species from a Mediterranean old - field  
437 succession, *Funct. Ecol.*, 20, 21-30, 2006.
- 438 Kenzo, T., Ichie, T., Hattori, D., Kendawang, J. J., Sakurai, K., and Ninomiya, I.: Changes in  
439 above-and belowground biomass in early successional tropical secondary forests after  
440 shifting cultivation in Sarawak, Malaysia, *Forest Ecol. Manag.*, 260, 875-882, 2010.
- 441 Khan, M. N. I., Suwa, R., and Hagihara, A.: Carbon and nitrogen pools in a mangrove stand of  
442 *Kandelia obovata* (S., L.) Yong: vertical distribution in the soil–vegetation system, *Wetl.*  
443 *Ecol. Manag.*, 15, 141-153, 2007.
- 444 Klemmedson, J. O., and Barth, R. C.: Distribution and Balance of Biomass and Nutrients in  
445 Desert Shrub Ecosystems, *Reports of Progress*, 1975.
- 446 Kong, D., Ma, C., Zhang, Q., Li, L., Chen, X., Zeng, H., and Guo, D.: Leading dimensions in  
447 absorptive root trait variation across 96 subtropical forest species, *New Phytol.*, 203, 863-  
448 872, 2014.
- 449 Korhonen, J., Pihlatie, M., Pumpanen, J., Aaltonen, H., Hari, P., Levula, J., Kieloaho, A.-J.,  
450 Nikinmaa, E., Vesala, T., and Ilvesniemi, H.: Nitrogen balance of a boreal Scots pine forest,  
451 2013.
- 452 Kotowska, M. M., Leuschner, C., Triadiati, T., Meriem, S., and Hertel, D.: Quantifying  
453 above - and belowground biomass carbon loss with forest conversion in tropical lowlands  
454 of Sumatra (Indonesia), *Global Change Biol.*, 21, 3620-3634, 2015.
- 455 Kovács, M., Engloner, A., Németh, N., and et al.: Chemical composition of Bermuda grass  
456 (*Cynodon dactylon*) in Hungary, *Acta agronomica hungarica*, 50, 151-156, 2002.
- 457 Kraenzel, M., Castillo, A., Moore, T., and Potvin, C.: Carbon storage of harvest-age teak  
458 (*Tectona grandis*) plantations, Panama, *Forest Ecol. Manag.*, 173, 213-225, 2003.
- 459 Kridiborworn, P., Chidthaisong, A., Yuttitham, M., and Tripetchkul, S.: Carbon sequestration  
460 by mangrove forest planted specifically for charcoal production in Yeasarn, Samut  
461 Songkram, *J. Sustain. Energy Environ.*, 3, 87-92, 2012.



- 462 Kumar, M., Singh, R., Panigrahy, S., and Raghubanshi, A.: Carbon density and accumulation  
463 in agroecosystem of Indo-Gangetic Plains and Vindhyan highlands, India, Environ. Monit.  
464 Assess., 186, 4971, 2014.
- 465 Kurokawa, H., and Nakashizuka, T.: Leaf herbivory and decomposability in a Malaysian  
466 tropical rain forest, Ecology, 89, 2645-2656, 2008.
- 467 Lal, C., Annapurna, C., Raghubanshi, A., and Singh, J.: Effect of leaf habit and soil type on  
468 nutrient resorption and conservation in woody species of a dry tropical environment,  
469 Canad. J. Bot., 79, 1066-1075, 2001.
- 470 Lal, C. B., Annapurna, C., Raghubanshi, A. S., and Singh, J. S.: Foliar Demand and Resource  
471 Economy of Nutrients in Dry Tropical Forest Species, J. Veg .Sci., 12, 5-14, 2010.
- 472 Lamblom, S., and Savidge, R.: A reassessment of carbon content in wood: variation within and  
473 between 41 North American species, Biomass Bioenerg., 25, 381-388, 2003.
- 474 Lamblom, S. H., and Savidge, R. A.: Carbon content variation in boles of mature sugar maple  
475 and giant sequoia, Tree Physiol., 26, 459-468, 2006.
- 476 Lang, F.: Research on populatiaon structure and carbon storage of *Castanopsis eyrei* natural  
477 forest in Wuyi Mountain, Fujian Normal University, 2013. (in Chinese).
- 478 Larr é-Larrouy, M. C., Blanchart, E., Albrecht, A., and Feller, C.: Carbon and monosaccharides  
479 of a tropical Vertisol under pasture and market-gardening: distribution in secondary  
480 organomineral separates, Geoderma, 119, 163-178, 2004.
- 481 Laughlin, D. C., Leppert, J. J., Moore, M. M., and Sieg, C. H.: A multi - trait test of the leaf -  
482 height - seed plant strategy scheme with 133 species from a pine forest flora, Funct. Ecol.,  
483 24, 493-501, 2010.
- 484 Laughlin, D. C., Fule, P. Z., Huffman, D. W., Crouse, J., and Laliberte, E.: Climatic constraints  
485 on trait - based forest assembly, J. Ecol., 99, 1489-1499, 2011.
- 486 Lehmann, J., Schroth, G., and Zech, W.: Decomposition and nutrient release from leaves, twigs  
487 and roots of three alley-cropped tree legumes in central Togo, Agroforest Sys.t, 29, 21-36,  
488 1995.
- 489 Lei, P., Xiang, W., Tian, D., and Fang, X.: Carbon storage and distribution in *Cinnamomum*  
490 *camphor* plantation, Chinese J. Ecol., 23, 25-30, 2004. (in Chinese).

- 491 Lett, M. S., Knapp, A. K., Briggs, J. M., and Blair, J. M.: Influence of shrub encroachment on  
492 aboveground net primary productivity and carbon and nitrogen pools in a mesic grassland,  
493 Can. J. Bot, 82, 1363-1370, 2004.
- 494 Li, B., Fang, X., Tian, D., Xiang, W., Yan, W., Kang, W., and Deng, X.: Studies on carbon  
495 concentration of main forest vegetation tree species in Hunan province, J Central South  
496 Univ Forest. Tech., 71-78, 2015. (in Chinese).
- 497 Li, C., Wu, B., Zhang, Y., Geng, X., and Liu, Y.: Carbon content of poplar in shelterbelt at  
498 Yuncheng County, Shandong Province, J. Beijing Forestry Univ., 32, 74-78, 2010. (in  
499 Chinese).
- 500 Li, C. Y., Wu, C. C., Duan, B. L., Korpelainen, H., and Luukkanen, O.: Age-related nutrient  
501 content and carbon isotope composition in the leaves and branches of *Quercus*  
502 *aquifolioides* along an altitudinal gradient, Trees, 23, 1109-1121, 2009a.
- 503 Li, D.: Study on carbon storage and allocation of the monsoonal evergreen broad-leaved forests  
504 in Xishuangbanna, XiShuangBanNa Tropical Botanical Garden, Chinese Academy of  
505 Sciences, Kunming, 2006. (in Chinese).
- 506 Li, H., Chen, L., Fang, s., and Sun, Q.: Comparison of Carbon Storage and Distribution in  
507 Different Poplar-Crop Intercropping Patterns, Scientia Silvae Sinicae, 45, 9-14, 2009b. (in  
508 Chinese).
- 509 Li, H., Li, J., He, Y., Li, S., Liang, Z., Peng, C., Polle, A., and Luo, Z.-B.: Changes in carbon,  
510 nutrients and stoichiometric relations under different soil depths, plant tissues and ages in  
511 black locust plantations, Acta physiologiae plantarum, 35, 2951-2964, 2013.
- 512 Li, J., Zhai, M., Zhu, H., Meng, M., Qiu, Q., Mao, Y., Chen, H., and Guo, Y.: Carbon contents  
513 of *Pinus Kesiya* Royle ex Gord. Var. *langbianensis* Young and Middle Aged Plantations  
514 (in Chinese), J. Fujian Forestry Sci and Tech, 36, 12-15, 2009c. (in Chinese).
- 515 Li, K.: Study on Distribution Characteristics about Carbon Content and Carbon Density of  
516 Three Main Plant Communities in Daqinggou, Inner Mongolia Agricultural University,  
517 2013a. (in Chinese).
- 518 Li, L.: Research on carbon sink characteristics of the main six vegetation ecosystems in the  
519 Southern Ningxia of loess hilly region, Xi'an Univ. Sci.Tech., 2014. (in Chinese).

- 520 Li, M., Yu, M., CHen, Q., Chang, J., and Pan, X.: Dynamics of carbon in the evergreen broad-  
521 leaved forest dominated by *cyclobalanopsis glauca* in South-East China, *Acta Ecologica*  
522 *Sinica*, 16, 645-651, 1996. (in Chinese).
- 523 Li, Q.: The Research On Carbon Storage Of Populus-Crop Intercropping System In The  
524 Huanghuaihai Plain, Henan Agricultural University, 2008. (in Chinese).
- 525 Li, S., Tian, D., Yan, W., Fang, X., Deng, X., and Liu, Q.: Carbon storage and tlistribution of  
526 urban poplar plantation at karst topography area, *J. Central South Univ. Forest. Tech.*, 31,  
527 140-145, 2011a. (in Chinese).
- 528 Li, X., Yi, M. J., Son, Y., Park, P. S., Lee, K. H., Son, Y. M., Kim, R. H., and Jeong, M. J.:  
529 Biomass and carbon storage in an age-sequence of Korean pine (*Pinus koraiensis*)  
530 plantation forests in central Korea, *J. Plant Biol.*, 54, 33-42, 2011b.
- 531 Li, X.: Study on the biomass, nutrient content and reserves of *Betula alnoides* plantation,  
532 Guangxi University, , 2013b. (in Chinese).
- 533 Liguori, G., Gugliuzza, G., and Inglese, P.: Evaluating carbon fluxes in orange orchards in  
534 relation to planting density, *J. Agric. Sci.*, 147, 637-645, 2009.
- 535 Lillis, M., and Fontanella, A.: Comparative phenology and growth in different species of the  
536 Mediterranean maquis of central Italy, *Plant Ecol.*, 99, 83-96, 1992.
- 537 Lindsay, E. A., and French, K.: Litterfall and nitrogen cycling following invasion by  
538 *Chrysanthemoides monilifera* ssp. *rotundata* in coastal Australia, *J. Appl. Ecol.*, 42, 556-  
539 566, 2005.
- 540 Liu, W., Fox, J. E., and Xu, Z.: Biomass and nutrient accumulation in montane evergreen broad-  
541 leaved forest (*Lithocarpus xylocarpus* type) in Ailao Mountains, SW China, *Forest Ecol.*  
542 *Manag.*, 158, 223-235, 2002.
- 543 Liu, W., Su, J., Li, S., Lang, X., Zhang, Z., and Huang, X.: Leaf carbon, nitrogen and  
544 phosphorus stoichiometry at different growth stages in dominant tree species of a monsoon  
545 broad-leaved evergreen forest in Pu'er, Yunnan Province, China, 39, 52-62, 2015. (in  
546 Chinese).
- 547 Liu, X.: Productivity, organic carbon and nutrient dynamics in *Phyllostachys pubescens*  
548 ecosystem in Northern subtropical area, Anhui Agricultural University, 2011. (in Chinese).

549 Ma, M., Jiang, H., and Liu, Y.: Biomass, Carbon Content, Carbon Storage and Their Vertical  
550 Distribution of *Phoebe bournei* Artificial Stand, *Scientia Silvae Sinicae*, 44, 34-39, 2008.  
551 (in Chinese).

552 Ma, M.: Researches on carbon distribution and carbon pool of main natural forest at Huoditang  
553 forestry region in the Qingling Mountains, NORTHWEST A&F UNIVERSITY, 2009. (in  
554 Chinese).

555 Ma, M., Luo, C., Jiang, H., Liu, Y., and Xi, L. I.: Carbon sink in *Phoebe bournei* artificial forest  
556 ecosystem, *Frontiers Forest. China*, 4, 140-145, 2009.

557 Ma, Q.: Carbon content rate in constructive species of main forest types in northern China, *J.*  
558 *Beijing Forest. Univ.*, 24, 96-100, 2001. (in Chinese).

559 Ma, S., Baldocchi, D. D., Mambelli, S., and Dawson, T. E.: Are temporal variations of leaf  
560 traits responsible for seasonal and inter - annual variability in ecosystem CO<sub>2</sub> exchange?,  
561 *Funct. Ecol.*, 25, 258-270, 2011.

562 Ma, Z. Q., Hartmann, H., Wang, H. M., Li, Q. K., Wang, Y. D., and Li, S. G.: Carbon dynamics  
563 and stability between native Masson pine and exotic slash pine plantations in subtropical  
564 China, *Eur. J. Forest Res.*, 133, 307-321, 2014.

565 Maiti, R., Rodriguez, H., and Kumari Ch, A.: Trees and Shrubs with High Carbon  
566 Fixation/Concentration, *Forest Res. S*, 1, 2, 2015.

567 Makineci, E., Ozdemir, E., Caliskan, S., Yilmaz, E., Kumbasli, M., Ketten, A., Beskardes, V.,  
568 Zengin, H., and Yilmaz, H.: Ecosystem carbon pools of coppice-originated oak forests at  
569 different development stages, *Eur. J. Forest Res.*, 134, 1-15, 2015.

570 Manlay, R. J., Kairé M., Masse, D., Chotte, J.-L., Ciornei, G., and Floret, C.: Carbon, nitrogen  
571 and phosphorus allocation in agro-ecosystems of a West African savanna: I. The plant  
572 component under semi-permanent cultivation, *Agric. Ecosyst. Environ.*, 88, 215-232,  
573 2002.

574 Mansoer, Z., Reeves, D. W., and Wood, C.: Suitability of sunn hemp as an alternative late-  
575 summer legume cover crop, *Soil Science Society of America Journal*, 61, 246-253, 1997.

576 Marron, N., and Ceulemans, R.: Genetic variation of leaf traits related to productivity in a  
577 *Populus deltoides* × *Populus nigra* family, *Can. J. Forest Res.*, 36, 390-400, 2006.

578 Martens, D. A.: Plant residue biochemistry regulates soil carbon cycling and carbon  
579 sequestration, *Soil Biol. Biochem.*, 32, 361-369, 2000.

580 Martin, A. R., and Thomas, S. C.: A reassessment of carbon content in tropical trees, *Plos One*,  
581 6, e23533, 2011.

582 Martin, A. R., Thomas, S. C., and Zhao, Y.: Size-dependent changes in wood chemical traits:  
583 a comparison of neotropical saplings and large trees, *AoB Plants*, 5, 2013.

584 Martin, A. R., Gezahegn, S., and Thomas, S. C.: Variation in carbon and nitrogen concentration  
585 among major woody tissue types in temperate trees, *Can. J. Forest Res.*, 45, 744-757, 2015.

586 Matson, P.: Plant-soil interactions in primary succession at Hawaii Volcanoes National Park,  
587 *Oecologia*, 85, 241-246, 1990.

588 Mazzarino, M., Bertiller, M., Schlichter, T., and Gobbi, M.: Nutrient cycling in Patagonian  
589 ecosystems, *Ecolog á Austral*, 8, 167-181, 1998.

590 Mazzilli, S. R., Kemanian, A. R., Ernst, O. R., Jackson, R. B., and Pineiro, G.: Greater  
591 humification of belowground than aboveground biomass carbon into particulate soil  
592 organic matter in no-till corn and soybean crops, *Soil Biol. Biochem.*, 85, 22-30, 2015.

593 Mchenry, M. P.: Harnessing landholder's knowledge for environmental monitoring and  
594 management for new environmental markets: Lessons from plantation forestry carbon  
595 sequestration in Western Australia, Nova Science Publishers, 2013.

596 Men, X.: The Spatial Distribution Characteristics of Biomass and Carbon Density of Temperate  
597 Desert Grassland in Northern Xinjiang, Xinjiang Agricultural University, 2013. (in  
598 Chinese).

599 Merino, J., Field, C., and Mooney, H.: Construction and maintenance costs of mediterranean-  
600 climate evergreen and deciduous leaves I. Growth and CO<sub>2</sub> exchange analysis, *Oecologia*,  
601 53, 208-213, 1982.

602 Milby, J. L.: Ecophysiological responses of herbaceous plants to the presence or absence of  
603 *Amorpha canescens* in a Nebraska sandhills grassland, University of Nebraska, 2011.

604 Minden, V., and Kleyer, M.: Internal and external regulation of plant organ stoichiometry, *Plant*  
605 *Biol.*, 16, 897-907, 2014.

- 606 Ming, A., Jia, H., Zhao, J., Tao, Y., and Li, Y.: Above- and Below-Ground Carbon Stocks in  
607 an Indigenous Tree (*Mytilaria laosensis*) Plantation Chronosequence in Subtropical China,  
608 Plos One, 9, e109730, 2014.
- 609 Mishra, A. K., Singh, K., Singh, K., Srivastava, S., Sarware, M., and Ali, S.: Carbon sequestered  
610 through biomass and soil organic carbon dynamics in *Jatropha curcas* L, Ecol. Environ.  
611 Conserv., 20, 561-565, 2014.
- 612 Monclus, R., Dreyer, E., Delmotte, F. M., Villar, M., Delay, D., Boudouresque, E., Petit, J. M.,  
613 Marron, N., Br  chet, C., and Brignolas, F.: Productivity, leaf traits and carbon isotope  
614 discrimination in 29 *Populus deltoides*  $\times$  *P. nigra* clones, New Phytol., 167, 53-62, 2005.
- 615 Montane, F., Romanya, J., Rovira, P., and Casals, P.: Aboveground litter quality changes may  
616 drive soil organic carbon increase after shrub encroachment into mountain grasslands,  
617 Plant Soil, 337, 151-165, 2010.
- 618 Mund, M., Kutsch, W., Wirth, C., Kahl, T., Knohl, A., Skomarkova, M., and Schulze, E. D.:  
619 The influence of climate and fructification on the inter-annual variability of stem growth  
620 and net primary productivity in an old-growth, mixed beech forest, Tree Physiol., 30, 689-  
621 704, 2010.
- 622 Nagel, J. M., and Griffin, K. L.: Construction cost and invasive potential: comparing *Lythrum*  
623 *salicaria* (Lythraceae) with co-occurring native species along pond banks, Am. J. Bot., 88,  
624 2252-2258, 2001.
- 625 Nelson, D. W., Sommers, L. E., Sparks, D. L., Page, A. L., Helmke, P. A., Loeppert, R. H.,  
626 Soltanpour, P. N., Tabatabai, M. A., Johnston, C. T., and Sumner, M. E.: Total carbon,  
627 organic carbon, and organic matter, Methods of Soil Analysis Part—chemical Methods,  
628 961-1010, 1996.
- 629 Niinemets,   .: Energy requirement for foliage construction depends on tree size in young *Picea*  
630 *abies* trees, Trees., 11, 420-431, 1997.
- 631 Niinemets,   .: Global - scale climatic controls of leaf dry mass per area, density, and thickness  
632 in trees and shrubs, Ecology, 82, 453-469, 2001.
- 633 Niinemets,   ., Portsmouth, A., and Truus, L.: Leaf structural and photosynthetic characteristics,  
634 and biomass allocation to foliage in relation to foliar nitrogen content and tree size in three  
635 *Betula* species, Ann. Bot., 89, 191-204, 2002.

- 636 Niu, C.: STUDY ON BIOMASS AND CARBON STORAGE IN MIXED AND PURE  
637 STANDS OF *Pinus massoniana* AND *Castanopsis hystrix*, Guangxi University, 2012. (in  
638 Chinese).
- 639 Niu, D., Li, Q., Jiang, S., Chang, P., and Fu, H.: Seasonal variations of leaf C:N:P stoichiometry  
640 of six shrubs in desert of China's Alxa Plateau, Chinese Journal of Plant Ecology, 37, 317-  
641 325, 2013. (in Chinese).
- 642 Northup, B. K., Zitzer, S. F., Archer, S., Mcmurtry, C. R., and Boutton, T. W.: Above-ground  
643 biomass and carbon and nitrogen content of woody species in a subtropical thornscrub  
644 parkland, J. Arid Environ., 62, 23-43, 2005.
- 645 Oguntala, and Babatunde, A.: Studies on seedling growth of temperate and tropical trees,  
646 University of London, 1974.
- 647 Paladinić, E., Vuletić, D., Martinić, I., Marjanović, H., Indir, K., Benko, M., and Novotny, V.:  
648 Forest biomass and sequestered carbon estimation according to main tree components on  
649 the forest stand scale, Periodicum biologorum, 111, 459-466, 2009.
- 650 Paul, K., Jacobsen, K., Koul, V., Leppert, P., and Smith, J.: Predicting growth and sequestration  
651 of carbon by plantations growing in regions of low-rainfall in southern Australia, Forest  
652 Eco.l Manag., 254, 205-216, 2008.
- 653 Peart, M.: Observations on carbon and nitrogen content of suspended matter in aheadwater  
654 stream in Hong Kong, J. Environ.Sci., 16, 533-538, 2004.
- 655 Peichl, M., Thevathasan, N. V., Gordon, A. M., Huss, J., and Abohassan, R. A.: Carbon  
656 sequestration potentials in temperate tree-based intercropping systems, southern Ontario,  
657 Canada, Agroforest Syst., 66, 243-257, 2006.
- 658 Peng, Y.: Researches on Carbon Sequestration Function of plant subsystem in Rubber(*Hevea*  
659 *brasiliensis*) Plantation Ecosystem in western Hainan, Hainan University, 2010. (in  
660 Chinese).
- 661 Penuelas, J., Sardans, J., Llusia, J., Owen, S. M., Carnicer, J., Giambelluca, T. W., Rezende, E.  
662 L., Waite, M., and Niinemets, U.: Faster returns on 'leaf economics' and different  
663 biogeochemical niche in invasive compared with native plant species, Global Change Biol.,  
664 16, 2171-2185, 2010.

- 665 Perez-Quezada, J., Delpiano, C., Snyder, K., Johnson, D., and Franck, N.: Carbon pools in an  
666 arid shrubland in Chile under natural and afforested conditions, *J. Arid Environ.*, 75, 29-  
667 37, 2011.
- 668 Pérez, C. A., Armesto, J. J., Torrealba, C., and Carmona, M. R.: Litterfall dynamics and  
669 nitrogen use efficiency in two evergreen temperate rainforests of southern Chile, *Austral.*  
670 *Ecol.*, 28, 591-600, 2003.
- 671 Peri, P. L., Gargaglione, V., Pastur, G. M., and Lencinas, M. V.: Carbon accumulation along a  
672 stand development sequence of *Nothofagus antarctica* forests across a gradient in site  
673 quality in Southern Patagonia, *Forest Ecol. Manag.*, 260, 229-237, 2010.
- 674 Peri, P. L., and Lasagno, R. G.: Biomass, carbon and nutrient storage for dominant grasses of  
675 cold temperate steppe grasslands in southern Patagonia, Argentina, *J. Arid Environ.*, 74,  
676 23-34, 2010.
- 677 Pierce, S., Brusa, G., Sartori, M., and Cerabolini, B. E.: Combined use of leaf size and  
678 economics traits allows direct comparison of hydrophyte and terrestrial herbaceous  
679 adaptive strategies, *Ann. Bot.*, 109, 1047-1053, 2012.
- 680 Pierce, S., Brusa, G., Vagge, I., and Cerabolini, B. E.: Allocating CSR plant functional types:  
681 the use of leaf economics and size traits to classify woody and herbaceous vascular plants,  
682 *Funct. Ecol.*, 27, 1002-1010, 2013.
- 683 Pizelle, G.: Seasonal variations of the sexual reproductive growth and nitrogenase activity (C 2  
684 H 2) in mature *Alnus glutinosa*, *Plant Soil*, 78, 181-188, 1984.
- 685 Pompô, M. L., Henry, R., and Moschini-Carlos, V.: Chemical composition of tropical  
686 macrophyte *Echinochloa polystachya* (hbk) Hitchcock in Jurumirim Reservoir (s ão Paulo,  
687 Brazil), *Hydrobiologia*, 411, 1-11, 1999.
- 688 Powers, J. S., and Tiffin, P.: Plant functional type classifications in tropical dry forests in Costa  
689 Rica: leaf habit versus taxonomic approaches, *Funct. Ecol.*, 24, 927-936, 2010.
- 690 Pregitzer, K. S., Kubiske, M. E., Yu, C. K., and Hendrick, R. L.: Relationships among root  
691 branch order, carbon, and nitrogen in four temperate species, *Oecologia*, 111, 302-308,  
692 1997.



693 Prentice, I. C., Meng, T., Wang, H., Harrison, S. P., Ni, J., and Wang, G.: Evidence of a  
694 universal scaling relationship for leaf CO<sub>2</sub> drawdown along an aridity gradient, *New*  
695 *Phytol.*, 190, 169-180, 2011.

696 Prieto, I., Roumet, C., Cardinael, R., Dupraz, C., Jourdan, C., Kim, J. H., Maeght, J. L., Mao,  
697 Z., Pierret, A., Portillo, N., Rouspard, O., Thammahacksa, C., and Stokes, A.: Data from:  
698 Root functional parameters along a land use gradient: evidence of a community-level  
699 economics spectrum. Dryad Data Repository, 2014.

700 Pulhin, F., Lasco, R., and Urquiola, J.: Carbon sequestration potential of oil palm in Bohol,  
701 Philippines, *Ecosyst. Dev. J.*, 4, 14-19, 2015.

702 Qi, L., Liu, G., Fan, S., Yue, X., Zhang, H., and Du, M.: Effects of different tending measures  
703 on carbon density, storage , and allocation pattern of *Phyllostachy edulis* forests in western  
704 Fujian Province, *Chinese J. Ecol.*, 28, 1482-1488, 2009. (in Chinese).

705 Quemada, M., and Cabrera, M. L.: Carbon and Nitrogen Mineralized from Leaves and Stems  
706 of Four Cover Crops, *Soil Sci. Soc. Am. J.*, 471-477, 1995.

707 Quesnel, H., and Lavkulich, L. M.: Comparison of the chemical properties of forest floors,  
708 decaying wood, and fine roots in three ecosystems on Vancouver Island, *Can. J. Forest*  
709 *Res.*, 11, 216-218, 1981.

710 Raddad, E. Y., Luukkanen, O., Salih, A. A., Kaarakka, V., and Elfadl, M. A.: Productivity and  
711 nutrient cycling in young *Acacia senegal* farming systems on Vertisol in the Blue Nile  
712 region, Sudan, *Agroforest Syst.*, 68, 193-207, 2006.

713 Raizada, A., Ghosh, B., Jayaprakash, J., and Singh, C.: Biomass production, carbon  
714 sequestration and water transmission properties as influenced by densified plantations  
715 raised on old river bed lands in the north west Himalayas, 2013.

716 Ren, H., Chen, H., Li, Z. a., and Han, W.: Biomass accumulation and carbon storage of four  
717 different aged *Sonneratia apetala* plantations in Southern China, *Plant Soil*, 327, 279-291,  
718 2010.

719 Ribeiro, S. C., Soares, C. P. B., Fehrmann, L., Jacovine, L. A. G., and von Gadow, K.:  
720 Aboveground and belowground biomass and carbon estimates for clonal *Eucalyptus* trees  
721 in Southeast Brazil, *Revista Árvore*, 39, 353-363, 2015.

- 722 Ritson, P., and Sochacki, S.: Measurement and prediction of biomass and carbon content of  
723 *Pinus pinaster* trees in farm forestry plantations, south-western Australia, Forest Ecol.  
724 Manag., 175, 103-117, 2003.
- 725 Rodrigues, D. P., Hamacher, C., Estrada, G. C. D., and Soares, M. L. G.: Variability of carbon  
726 content in mangrove species: Effect of species, compartments and tidal frequency, Aquat  
727 Bot., 120, 346-351, 2015.
- 728 Ruan, H., Jiang, Z., and Gao, S.: Preliminary studies of carbon cycling in three types of forests  
729 in the Hilly Regions of Southern Jiangsu Province, Chinese J Ecol., 16, 17-21, 1997. (in  
730 Chinese).
- 731 Ruotsalainen, A. L., Markkola, A., and Kozlov, M. V.: Root fungal colonisation in  
732 *Deschampsia flexuosa*: Effects of pollution and neighbouring trees, Environ. Poll., 147,  
733 723-728, 2007.
- 734 Salpagarova, F. S., Logtestijn, R. S. P. V., Onipchenko, V. G., Akhmetzhanova, A. A., and  
735 Agafonov, V. A.: Nitrogen content in fine roots and the structural and functional  
736 adaptations of alpine plants, Biol. Bull. Rev., 4, 243-251, 2014.
- 737 Samuelson, L. J., Stokes, T. A., Butnor, J. R., Johnsen, K. H., Gonzalez-Benecke, C. A.,  
738 Anderson, P., Jackson, J., Ferrari, L., Martin, T. A., and Cropper Jr, W. P.: Ecosystem  
739 carbon stocks in *Pinus palustris* forests, Can. J. Forest Res., 44, 476-486, 2014.
- 740 Sang, W., Ma, K., and Chen, L.: Primary study on carbon cycling in warm temperate deciduous  
741 broad-leaved forest, Acta Phytocologica Sinica, 26, 543-548, 2002. (in Chinese).
- 742 Sardans, J., Rivas-Ubach, A., and Peñuelas, J.: Factors affecting nutrient concentration and  
743 stoichiometry of forest trees in Catalonia (NE Spain), Forest Ecol. Manag., 262, 2024-  
744 2034, 2011.
- 745 Sardans, J., and Peñuelas, J.: Climate and taxonomy underlie different elemental concentrations  
746 and stoichiometries of forest species: the optimum “biogeochemical niche”, Plant Ecol.,  
747 215, 441-455, 2014.
- 748 Sariyildiz, T., and Anderson, J.: Variation in the chemical composition of green leaves and leaf  
749 litters from three deciduous tree species growing on different soil types, Forest Ecol.  
750 Manag., 210, 303-319, 2005.

- 751 Scalenghe, R., Celi, L., Costa, G., Laudicina, V. A., Santoni, S., Vespertino, D., and La Mantia,  
752 T.: Carbon stocks in a 50-year-old *Eucalyptus camaldulensis* stand in Sicily, Italy,  
753 Southern Forests: J. Forest Sci., 77, 263-267, 2015.
- 754 Scarano, F. R., Duarte, H. M., Franco, A. C., Geßler, A., Mattos, E. A. D., Nahm, M.,  
755 Rennenberg, H., Zaluar, H. L. T., and Lüttge, U.: Ecophysiology of selected tree species  
756 in different plant communities at the periphery of the Atlantic Forest of SE Brazil I.  
757 Performance of three different species of *Clusia* in an array of plant communities, Trees,  
758 19, 497-509, 2005.
- 759 Schädler, M., Jung, G., Auge, H., and Brandl, R.: Palatability, decomposition and insect  
760 herbivory: patterns in a successional old - field plant community, Oikos, 103, 121-132,  
761 2003.
- 762 Schwintzer, C. R.: Primary productivity and nitrogen, carbon, and biomass distribution in a  
763 dense *Myrica gale* stand, Can. J. Bot., 61, 2943-2948, 1983.
- 764 Shen, H., Zhang, W., Yang, X., Liu, X., Cao, J., Zeng, X., Zhao, X., Chen, X., and Zhang, W.:  
765 Carbon Storage Capacity of Different Plantation Types Under Sandstorm Source Control  
766 Program in Hebei Province, China, Chinese Geographical Science, 24, 454-460, 2014.
- 767 Shen, W., Liu, Y., Ma, Q., and Yang, F.: Study on carbon distribution, carbon storage and  
768 carbon sequestration in coniferous plantation in Qianyanzhou, Pract. Forest. Tech., 8, 2006.  
769 (in Chinese).
- 770 Singh, B., and Behl, H.: Energy flow, carbon and nitrogen cycling in *Populus deltoides* clones  
771 in north India, Biomass Bioenerg., 17, 345-356, 1999.
- 772 Singh, G., Singh, K., Mishra, D., and Shukla, S.: Vegetation diversity and role of *Leptadenia*  
773 *pyrotechnica* in biomass contribution and carbon storage in arid zone of India, Arid  
774 Ecosystems, 2, 264-272, 2012.
- 775 Singh, R.: Effect of winter fire on primary productivity and nutrient concentration of a dry  
776 tropical savanna, Plant Ecol., 106, 63-71, 1993.
- 777 Singh, S., Badgujar, G., Reddy, V., Fleisher, D., and Timlin, D.: Effect of phosphorus nutrition  
778 on growth and physiology of cotton under ambient and elevated carbon dioxide, J. agron.  
779 Crop Sci., 199, 436-448, 2013.

780 Soetaert, K., Hoffmann, M., Meire, P., Starink, M., van Oevelen, D., Van Regenmortel, S., and  
781 Cox, T.: Modeling growth and carbon allocation in two reed beds (*Phragmites australis*)  
782 in the Scheldt estuary, *Aquat Bot.*, 79, 211-234, 2004.

783 Spasojevic, M. J., and Suding, K. N.: Inferring community assembly mechanisms from  
784 functional diversity patterns: the importance of multiple assembly processes, *J. Ecol.*, 100,  
785 652-661, 2012.

786 Swamy, S., and Puri, S.: Biomass production and C-sequestration of *Gmelina arborea* in  
787 plantation and agroforestry system in India, *Agroforest Sys.*, 64, 181-195, 2005.

788 Szpak, P., White, C. D., Longstaffe, F. J., Millaire, J.-F., and Sánchez, V. F. V.: Carbon and  
789 nitrogen isotopic survey of northern Peruvian plants: baselines for paleodietary and  
790 paleoecological studies, *Plos One*, 8, e53763, 2013.

791 Tang, J., Yin, J., Qi, J., Jepsen, M. R., and Lü, X.: Ecosystem carbon storage of tropical forests  
792 over limestone in Xishuangbanna, SW China, *Journal of Tropical Forest Science*, 399-407,  
793 2012.

794 Tang, X., Huang, C., Zhang, J., and Ning, Y.: An analysis of the carbon content rate in main  
795 coniferous species in Sichuan, *J. Sichuan Forest. Sci. Tech.*, 28, 20-23, 2007. (in Chinese).

796 Thomas, S., and Malczewski, G.: Wood carbon content of tree species in Eastern China:  
797 interspecific variability and the importance of the volatile fraction, *J. Environ. Manage.*,  
798 85, 659-662, 2007.

799 Tian, D., Fang, X., and Xiang, W.: Carbon density of the Chinese fir plantation ecosystem at  
800 Huitong, Hunan Province, *Acta Ecologica Sinica*, 24, 2382-2386, 2004. (in Chinese).

801 Tibbets, T. M., and Molles, M. C.: C: N: P stoichiometry of dominant riparian trees and  
802 arthropods along the Middle Rio Grande, *Freshwater Biol.*, 50, 1882-1894, 2005.

803 Treydte, A. C., Bernasconi, S. M., Kreuzer, M., and Edwards, P. J.: Diet of the common  
804 warthog (*Phacochoerus africanus*) on former cattle grounds in a Tanzanian savanna, *J.*  
805 *Mamm.*, 87, 889-898, 2006.

806 Tripathi, S., Sumida, A., Shibata, H., Ono, K., Uemura, S., Kodama, Y., and Hara, T.: Leaf  
807 litterfall and decomposition of different above-and belowground parts of birch (*Betula*  
808 *ermanii*) trees and dwarf bamboo (*Sasa kurilensis*) shrubs in a young secondary forest in  
809 Northern Japan, *Biol. Fertil. Soil.*, 43, 237-246, 2006.

- 810 Uri, V., Varik, M., Aosaar, J., Kanal, A., Kukumägi, M., and Lõhmus, K.: Biomass production  
811 and carbon sequestration in a fertile silver birch (*Betula pendula* Roth) forest  
812 chronosequence, *Forest Ecol. Manag.*, 267, 117-126, 2012.
- 813 Ushakova, G., Shmakova, N. Y., and Koroleva, N.: Spatial Analysis of Soils, Vegetation,  
814 Productivity, and Carbon Stored in Mountain Tundra Ecosystems, Khibiny Mountains,  
815 Russia, *Polar Geograph.*, 27, 210-224, 2003.
- 816 Van Rijn, C. P., Heersche, I., Van Berkel, Y. E., Nevo, E., Lambers, H., and Poorter, H.: Growth  
817 characteristics in *Hordeum spontaneum* populations from different habitats, *New Phytol.*,  
818 146, 471-481, 2000.
- 819 Vesterdal, L., Ritter, E., and Gundersen, P.: Change in soil organic carbon following  
820 afforestation of former arable land, *Forest Ecol. Manag.*, 169, 137-147, 2002.
- 821 Viani, R. A., Rodrigues, R. R., Dawson, T. E., Lambers, H., and Oliveira, R. S.: Soil pH  
822 accounts for differences in species distribution and leaf nutrient concentrations of  
823 Brazilian woodland savannah and seasonally dry forest species, *Persp. Plant Ecol. Evol.*  
824 *System.*, 16, 64-74, 2014.
- 825 Vivian, L. M., and Cary, G. J.: Relationship between leaf traits and fire-response strategies in  
826 shrub species of a mountainous region of south-eastern Australia, *Ann. Bot.*, 109, 197-208,  
827 2012.
- 828 Vivin, P., Castelan-Estrada, M., and Gaudillere, J.: Seasonal changes in chemical composition  
829 and construction costs of grapevine tissues, *Vitis*, 42, 5-12, 2003.
- 830 Walton, E., and Fowke, P.: Estimation of the annual cost of kiwifruit vine growth and  
831 maintenance, *Ann. Bot.*, 76, 617-623, 1995.
- 832 Wang, D.: Studies on net carbon reserves in Beijing urban landscape green based on biomass  
833 measurement, Beijing Forestry University, 2010a. (in Chinese).
- 834 Wang, J., Che, K., and Jiang, Z.: A study on carbon balance of *Picea crassifolia* in Qilian  
835 Mountains, *J. Northwest Forest. Univ.*, 15, 9-14, 2000. (in Chinese).
- 836 Wang, J., Chen, Y., Cao, Y., Zhou, J., and Hou, L.: Carbon concentration and carbon storage  
837 in different components of natural *Quercus wutaishanica* forest in Ziwuling of Loess  
838 Plateau, Northwest China, *Chinese J. Ecol.*, 31, 3058-3063, 2012a. (in Chinese).

- 839 Wang, J., Wang, X., Yue, C., Cheng, F., Xue, T., Cheng, P., and Wang, X.: Carbon content rate  
840 in dominant species of four forest types in Shangri-la, northwest Yunnan province, Ecol.  
841 Environ. Sci., 21, 613-619, 2012b.
- 842 Wang, L., and Sun, M.: Caloric Values and Carbon Contents of Twelve Species of Shrubs in  
843 Northeast China, J. Northeast Forest Univ., 36, 42-42, 2008. (in Chinese).
- 844 Wang, L., and Sun, M.: Caloric values and carbon contents of dominant trees in Xiaoxing'anling  
845 forest region, Acta Ecologica Sinica, 29, 953-959, 2009. (in Chinese).
- 846 Wang, L., Zhao, G., Li, M., Zhang, M., Zhang, L., Zhang, X., An, L., and Xu, S.: C: N: P  
847 stoichiometry and leaf traits of halophytes in an arid saline environment, northwest China,  
848 Plos One, 10, e0119935, 2015a.
- 849 Wang, W. Q., Sardans, J., Wang, C., Zeng, C. S., Tong, C., Asensio, D., and Peñuelas, J.:  
850 Ecological stoichiometry of C, N, and P of invasive *Phragmites australis* and native  
851 *Cyperus malaccensis* species in the Minjiang River tidal estuarine wetlands of China, Plant  
852 Ecol., 216, 809, 2015b.
- 853 Wang, Y.: Study on Carbon Storage of Widespread Plantation Ecosystems in Fujian Province ,  
854 Fujian Agriculture and Forestry University, 2010b. (in Chinese).
- 855 Wang, Z., Lu, J., Yang, M., Yang, H., and Zhang, Q.: Stoichiometric characteristics of carbon,  
856 nitrogen, and phosphorus in leaves of differently aged lucerne (*Medicago sativa*) stands,  
857 Frontiers Plant Sci., 6, 2015c.
- 858 Wani, S. P., Chander, G., Sahrawat, K. L., Rao, C. S., Raghvendra, G., Susanna, P., and Pavani,  
859 M.: Carbon sequestration and land rehabilitation through *Jatropha curcas* (L.) plantation  
860 in degraded lands, Agric. Ecosyst. Environ., 161, 112-120, 2012.
- 861 Watzlawick, L. F., Martins, P. J., Rodrigues, A. L., Ebling, Â. A., Balbinot, R., and Lustosa, S.  
862 B. C.: Carbon concentration in species of the *araucaria* forest and effect of the ecological  
863 group, Cerne, 20, 613-620, 2014.
- 864 Wauters, J.-B., Coudert, S., Grallien, E., Jonard, M., and Ponette, Q.: Carbon stock in rubber  
865 tree plantations in Western Ghana and Mato Grosso (Brazil), Forest Ecol. Manag., 255,  
866 2347-2361, 2008.
- 867 Weerakkody, J., and Parkinson, D.: Leaf litter decomposition in an upper montane rainforest in  
868 Sri Lanka, Pedobiologia, 50, 387-395, 2006.

- 869 Wei, H., and Ma, X.: A study on the carbon storage and distubition in Chinese Fir plantation  
870 ecosystem of different growing stages in mid-subtropical zone, *Acta Agriculturae*  
871 *Universitatis Jiangxiensis*, 28, 239-243, 2006a. (in Chinese).
- 872 Wei, H., and Ma, X.: Study on the Carbon Storage and Distribution of *Phoebe bournei*  
873 Plantation Ecosystem of Different Growing Stages, *Yantai Nomal Univ. J. (Natural*  
874 *Science)*, 22, 130-133, 2006b. (in Chinese).
- 875 Wei, H., and Ma, X.: Study on the carbon storage and distribution of *Pinus massoniana* Lamb  
876 plantation ecosystem at different growing stages, *J. Northwest A. F. Univ. (Natural*  
877 *Science Edition)* 35, 171-174, 2007. (in Chinese).
- 878 Wei, W., You, W., Zhao, G., Zhang, h., Yan, T., and Huo, C.: Carbon storage and carbon  
879 sequestration of *Larix olgensis* plantation in Binglashan mountain in Liaoning province, *J.*  
880 *Inner Mongolia Agric. Unive.*, 32, 53-57, 2011. (in Chinese).
- 881 West, N. E.: Biomass and nutrient dynamics of some major cold desert shrubs, 1972.
- 882 Williams, M., Shimabokuro, Y. E., and Rastetter., E. B.: LBA-ECO CD-09 Soil and Vegetation  
883 Characteristics, Tapajos National Forest, Brazil., Oak Ridge National Laboratory  
884 Distributed Active Archive Center, Oak Ridge, Tennessee, U.S.A., 2012.
- 885 Willis, C. G., Halina, M., Lehman, C., Reich, P. B., Keen, A., McCarthy, S., and Cavender -  
886 Bares, J.: Phylogenetic community structure in Minnesota oak savanna is influenced by  
887 spatial extent and environmental variation, *Ecography*, 33, 565-577, 2010.
- 888 Windham-Myers, L., Marvin-DiPasquale, M., Kakouros, E., Agee, J. L., Kieu, L. H., Stricker,  
889 C. A., Fleck, J. A., and Ackerman, J. T.: Mercury cycling in agricultural and managed  
890 wetlands of California, USA: Seasonal influences of vegetation on mercury methylation,  
891 storage, and transport, *Sci. Total Environ.*, 484, 308-318, 2014.
- 892 Wu, F., Wang, K., Yang, W., Lu, Y., and Qiao, Y.: Effects of dwarf bamboo ( *Fargesia*  
893 *denudata*) density on seasonal changes in litter nutrient concentrations and their potential  
894 retranslocation, *Acta Phytocologica Sinica*, 29, 537-542, 2005.
- 895 Wu, X.: Study on biomass carbon accounting factors of Poplar plantation, Sichuan Agriculture  
896 University, 2008. (in Chinese).
- 897 Wu, X.: Research on the productivity and carbon density of natural Poplar and willow forest in  
898 Ergis River, Xinjiang, Inner Mongolia Agricultural University, 2009. (in Chinese).

- 899 Xia, X.: Biomass and carbon storage in old-growth *Pinus massoniana* Lamb. plantation  
900 ecosystem, Fujian Agriculture and Forestry University, 2008. (in Chinese).
- 901 Xie, R.: Carbon storage and its spatial distribution in Mianzhu stands in the Bamboo Sea of  
902 Southern Sichuan, Sichuan Agricultural University, Sichuan, 2013. (in Chinese).
- 903 Xing, L.: Study on organic carbon storage of forest ecosystem in Three Gorges Reservoir Area,  
904 Huazhong Agricultural University, Wuhan, 2008. (in Chinese).
- 905 Xu, L., and Baldocchi, D. D.: Seasonal trends in photosynthetic parameters and stomatal  
906 conductance of blue oak (*Quercus douglasii*) under prolonged summer drought and high  
907 temperature, *Tree Physiol.*, 23, 865-877, 2003.
- 908 Xu, X., Zhu, X., Wang, F., Mao, H., Cheng, Q., Wang, L., Wang, C., and Zhu, T.: Carbon  
909 Content Rate of 11 Reforestation Tree Species for Carbon Sink in Zhejiang, *J. Bamboo*  
910 *Res.*, 28, 21-24, 2009. (in Chinese).
- 911 Yang, L.: Study on the density, storage and distribution of carbon in *Alnus cre* artificial forest  
912 system, Central South University of Forestry&Technology, 2008. (in Chinese).
- 913 Yang, X., Cheng, J., and Meng, L.: Carbon storage and density features of natural forest of  
914 *Pinus tabulaeformis fshekannesis* in Loess Plateau, *Sci. Soil Water Conserv.*, 8, 41-45,  
915 2010a. (in Chinese).
- 916 Yang, X., Lu, S., Rao, L., Geng, S., Gao, D., and Feng, Z.: Carbon Storage and Spatial  
917 Distribution in Poplar Plantation in Xiping County of Henan Province, *Forest Res. Manag.*,  
918 38-42, 2010b. (in Chinese).
- 919 Yang, Z.: Carbon balance of *cunninghamia lanceolata* and *schima superba* in subtropical,  
920 Fujian Agriculture and Forestry University, 2007. (in Chinese).
- 921 Yanni, S. F., Whalen, J. K., and Ma, B.-L.: Field-grown Bt and non-Bt corn: yield, chemical  
922 composition, and decomposability, *Agron J*, 103, 486-493, 2011.
- 923 Yao, F., Chen, Y., Yan, Z., Li, P., Han, W., and Fang, J.: Biogeographic patterns of structural  
924 traits and C: N: P stoichiometry of tree twigs in China's forests, *Plos One*, 10, e0116391,  
925 2015.
- 926 Ye, G., Guo, R., Lu, C., Xiao, S., and Wu, H.: Carbon Storage of *Casuarina equisetifolia*  
927 Ecosystem in Different Growth Stages, *Hai Xia Ke Xue*, 10, 1-8, 2008. (in Chinese).



- 928 Yeboah, D., Burton, A. J., Storer, A. J., and Opuni-Frimpong, E.: Variation in wood density  
929 and carbon content of tropical plantation tree species from Ghana, *New Forest*, 45, 35,  
930 2014.
- 931 Yen, T. M., Ai, L. M., Li, C. L., Lee, J. S., and Huang, K. L.: Aboveground carbon contents  
932 and storage of three major Taiwanese conifer species, *Taiwan J. For. Sci.*, 24, 91-102,  
933 2009.
- 934 Yerena-Yamallel, J. I., Jiménez-Pérez, J., Aguirre-Calderón, O. A., and Treviño-Garza, E. J.:  
935 Concentración de carbono en la biomasa aérea del matorral espinoso tamaulipeco, *Revista*  
936 *Chapingo. Serie ciencias forestales y del ambiente*, 17, 283-291, 2011.
- 937 Yerena, Y., Jiménez, P., Aguirre, C., Treviño, G., and Alanís, R.: Carbon concentration in the  
938 stem of 21 conifer species from northeastern Mexico, *Revista Mexicana de Ciencias*  
939 *Forestales*, 3, 49-56, 2012.
- 940 Yguel, B., Bailey, R., Tosh, N. D., Vialatte, A., Vasseur, C., Vitrac, X., Jean, F., and Prinzing,  
941 A.: Phytophagy on phylogenetically isolated trees: why hosts should escape their relatives,  
942 *Ecol. Lett.*, 14, 1117-1124, 2011.
- 943 Yuan, X.: Effects of land use on terrestrial ecosystem organic C in red soil hilly region in  
944 subtropical China, Institute of Geographic Sciences and Natural Resources Research,  
945 Chinese Academy of Sciences, Beijing, 1999. (in Chinese).
- 946 Zhang, H.: Near Infrared Spectroscopy Based Larch Wood Carbon Content Prediction,  
947 Northeast Forestry University, 2013. (in Chinese).
- 948 Zhang, H., Song, T., Wang, K., Du, H., Yue, Y., Wang, G., and Zeng, F.: Biomass and carbon  
949 storage in an age-sequence of *Cyclobalanopsis glauca* plantations in southwest China,  
950 *Ecol. Eng.*, 73, 184-191, 2014a.
- 951 Zhang, J., Gu, L., Bao, F., Cao, Y., Hao, Y., He, J., Li, J., Li, Y., Ren, Y., and Wang, F.:  
952 Nitrogen control of  $^{13}\text{C}$  enrichment in heterotrophic organs relative to leaves in a  
953 landscape-building desert plant species, *Biogeosciences*, 12, 15, 2015.
- 954 Zhang, K., Xu, X., Wang, Q., and Liu, B.: Biomass, and carbon and nitrogen pools in a  
955 subtropical evergreen broad-leaved forest in eastern China, *J Forest Res.*, 15, 274-282,  
956 2010.

- 957 Zhang, K., He, m., Li, X., Tan, H., Gao, Y., Li, G., Han, G., and Wu, Y.: Foliar carbon, nitrogen  
958 and phosphorus stoichiometry of typical desert plants across the Alashan Desert, *Acta*  
959 *Ecologica Sinica*, 34, 6538-6547, 2014b. (in Chinese).
- 960 Zhang, P.: Study on forest carbon stock in Beijing of China, Beijing Forestry University, 2009.  
961 (in Chinese).
- 962 Zhang, Q., Wang, C., Wang, X., and Quan, X.: Carbon concentration variability of 10 Chinese  
963 temperate tree species, *Forest Ecol. Manag.*, 258, 722-727, 2009.
- 964 Zhao, H., Huang, G., Ma, J., Li, Y., and Tang, L.: Decomposition of aboveground and root litter  
965 for three desert herbs: mass loss and dynamics of mineral nutrients, *Biol. Fert. Soil.*, 50,  
966 745-753, 2013.
- 967 Zhao, J., Kang, F., Wang, L., Yu, X., Zhao, W., Song, X., Zhang, Y., Chen, F., Sun, Y., and  
968 He, T.: Patterns of biomass and carbon distribution across a chronosequence of Chinese  
969 pine (*Pinus tabulaeformis*) forests, *Plos One*, 9, e94966, 2014.
- 970 Zheng, H., Ouyang, Z., Xu, W., Wang, X., Miao, H., Li, X., and Tian, Y.: Variation of carbon  
971 storage by different reforestation types in the hilly red soil region of southern China, *Forest*  
972 *Ecol. Manag.*, 255, 1113-1121, 2008.
- 973 Zheng, S., and Shangguan, Z.: Spatial patterns of leaf nutrient traits of the plants in the Loess  
974 Plateau of China, *Trees.*, 21, 357-370, 2007.
- 975 Zheng, Z., Ma, C., Ma, j., Li, J., Liu, C., and Li, H.: Analysis on Carbon Sequestration Capacity  
976 and Energy Transfer Efficiency of Six Arbor Tree Species, *Journal of South Forestry*  
977 *University*, 31, 7-11, 2011. (in Chinese).
- 978 Zhou, W.: Studies on biomass and carbon density in different—aged *Picea asperata*, Central  
979 South University of Forestry and Technology, 2013. (in Chinese).
- 980 Zizka, A., Govender, N., and Higgins, S. I.: How to tell a shrub from a tree: A life - history  
981 perspective from a South African savanna, *Austral Ecol.*, 39, 767-778, 2015.
