# Supplementary material for: Variations and determinants of carbon content in plants: a global synthesis
Source: Copernicus journal article supplement (doi:10.5194/bg-15-693-2018), 2018-02-02
Supplement: Supplementary file 2 [file bg-15-693-2018-supplement.zip]

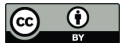

## *Supplement of*

# **Variations and determinants of carbon content in plants: a global synthesis**

**Suhui Ma et al.**

*Correspondence to:* Jingyun Fang ([jyfang@urban.pku.edu.cn](mailto:jyfang@urban.pku.edu.cn))

- [bg-15-693-2018-supplement-title-page.pdf](#)
- [Global plant C content dataset.csv](#)
- [R code for Figures and Table.R](#)
- [SUPPORTING INFORMATION.pdf](#)

The copyright of individual parts of the supplement might differ from the CC BY 4.0 License.
